# Supplementary material for: Synthetic lethality between CCNE1 hyperactivity and PARG inhibition in breast cancer
Source: Research Square preprint supplement (doi:10.21203/rs.3.rs-2231840/v1), 2022-11-21
Supplement: Supplementary file 1 [file c8367c94f6b141ed51a9e05d.xlsx]

## Sheet: Sheet1
Cell Line	Cell Count EC50 (microM)	Cell Count IC50 (microM)	CCNE1 mRNA (CCLE)
AU565	1.39	1.39	8.43592
BT-549	11.4	15.4	8.57006
BT20	30	30	7.5033
BT474	9.92	10.9	7.88492
CAMA-1	6.48	6.48	8.33679
EFM-19	17.2	17.2	7.8696
HCC70	2	2.03	8.27175
Hs 578T	30	30	6.68365
KPL-1	7.53	7.53	7.9464
MCF7	30	30	7.13023
MDA MB 231	7.41	15.2	8.18825
MDA MB 453	16.6	16.6	7.64895
MDA MB 468	0.0733	0.153	8.66717
MDA-MB-415	30	30	7.29038
MDA-MB-436	1.34	1.45	8.75833
MT-3	1.8	1.8
MX1	0.0497	0.152
SK-BR-3	3.81	3.81	8.95624
T47D	1.46	30	7.23276
ZR-75-1	1.82	1.95	8.68776

## Sheet: mRNA Correl.
Gene Expression	Correlation w/PARGi IC50
C16orf42	-0.744749
CCNE1	-0.731788
FAM20B	-0.718947
DYNLL1	-0.714748
DUSP23	-0.711731
UBE2Q1	-0.711098
NOL12	-0.704573
CRTC2	-0.701559
MRPS15	-0.693457
ZMPSTE24	-0.683922
C6orf192	-0.680744
PRCC	-0.677119
SLC4A2	-0.67162
OTUD4	-0.670023
STX10	-0.669444
PSMG3	-0.669337
DAP3	-0.663727
C1orf31	-0.663709
CLTA	-0.663292
TRMT2A	-0.661141
P2RY12	-0.660953
WDR78	-0.655764
PLG	-0.655449
GLRX2	-0.648839
DNAJA2	-0.647562
RAB3GAP2	-0.643063
IKBKE	-0.642308
C13orf27	-0.638787
PKMYT1	-0.636224
ITGAM	-0.633914
LIN9	-0.631437
TRIM14	-0.631055
SLC39A1	-0.62822
ZCCHC7	-0.627628
IER2	-0.627348
KATNB1	-0.625725
CARHSP1	-0.625435
TOMM5	-0.623375
TYMP	-0.623274
MELK	-0.622989
MRPL55	-0.618422
ZSCAN5A	-0.618379
PPIH	-0.617648
GBA2	-0.616169
TAF1A	-0.615665
HINT2	-0.613329
UBXN11	-0.612784
SMAD1	-0.610731
TRIM4	-0.609773
TOR3A	-0.608922
C17orf104	-0.603605
SLC38A7	-0.601598
BBOX1	-0.600807
MAPKAPK2	-0.600801
JUNB	-0.599293
MITF	-0.598773
RRM2	-0.598288
EMR2	-0.597909
FAM189B	-0.597561
USP31	-0.597365
TIMM10	-0.597222
ABCB10	-0.596386
FAM76A	-0.596089
UCK2	-0.59347
CD226	-0.592756
HSBP1L1	-0.592516
HEATR3	-0.592317
GPATCH4	-0.592234
TOMM40L	-0.591717
RFWD2	-0.590992
FGL1	-0.590551
FDPS	-0.590114
COQ9	-0.589731
TMEM63A	-0.589204
DCAF10	-0.585579
BARX2	-0.585042
ARF1	-0.582348
MAPK8IP3	-0.579539
ARGLU1	-0.578758
EXOSC3	-0.578495
MC5R	-0.578231
TRAPPC3	-0.577278
TOPORS	-0.576896
ISG20L2	-0.575896
SSBP3	-0.575305
INTS3	-0.572938
DPH2	-0.572282
RTKN	-0.571014
IMP5	-0.56473
ZNF593	-0.563996
E2F2	-0.563554
RANBP1	-0.562571
ATP11A	-0.562418
IVNS1ABP	-0.561862
SCLT1	-0.561852
C1QTNF9	-0.561225
NVL	-0.56062
RNF38	-0.560091
S100A9	-0.557675
FPGS	-0.557623
SH2B1	-0.557274
SAA3P	-0.556626
MLST8	-0.555976
ZC3H12A	-0.55559
MED18	-0.555329
C2orf54	-0.555011
PAQR4	-0.554736
ING3	-0.554569
YTHDF2	-0.554144
FOXJ2	-0.554094
DNTTIP2	-0.553793
FAM81A	-0.553528
RPS6	-0.553418
SFT2D2	-0.551582
MEAF6	-0.551026
BCL3	-0.550834
LOC157381	-0.5508
GEMIN6	-0.550722
SLPI	-0.550333
PROX2	-0.550011
TTLL12	-0.549923
FAM59A	-0.549677
ATP6V0B	-0.549533
ABLIM1	-0.549047
ZNF511	-0.548849
TPR	-0.548477
TRIP6	-0.548075
GRHPR	-0.547261
AXIN1	-0.546685
DCLK3	-0.546212
TCF15	-0.545829
ZNF576	-0.545087
CHD1L	-0.544743
TMEM56	-0.544626
IQCE	-0.544283
SLC17A8	-0.543437
SLC6A1	-0.542026
MEF2D	-0.541882
UHMK1	-0.541795
VPS72	-0.540912
EPRS	-0.540888
PI4KB	-0.540875
C16orf80	-0.54062
LPCAT3	-0.540523
AUH	-0.539926
ADAR	-0.539683
GALNT14	-0.538767
ATP5F1	-0.538134
NDUFB6	-0.537875
S100A8	-0.537525
NDUFA7	-0.536568
C9orf23	-0.534862
UCHL5	-0.534618
SIGMAR1	-0.534333
MORC1	-0.534249
ADCY3	-0.534203
SNHG12	-0.533799
RAD54L	-0.533611
RAD21L1	-0.533212
PLSCR2	-0.532814
GPR180	-0.532522
TWISTNB	-0.532487
SLC25A12	-0.531707
XIRP2	-0.531653
RBM15	-0.531404
ACAP3	-0.530801
CDKN2A	-0.53054
POLR3C	-0.530083
C2orf3	-0.529942
ENSA	-0.529791
NHEJ1	-0.52933
TYRO3	-0.529131
LBR	-0.527713
CTSS	-0.527356
GLRX3	-0.527245
LOC375196	-0.527057
C22orf46	-0.526922
ARHGEF11	-0.526654
FBXO28	-0.526601
UGT1A8	-0.525762
ITGA7	-0.525597
BCCIP	-0.525236
UBA52	-0.524664
CC2D1B	-0.524089
UNC13A	-0.523787
PHYHIP	-0.523112
PHB2	-0.523044
SDHB	-0.522744
TSNAX	-0.522577
DDX11	-0.522059
ATP6V1F	-0.521178
IQCF2	-0.520709
C17orf88	-0.520643
LRRC7	-0.520583
SFT2D1	-0.51998
RTCD1	-0.518699
LOC283070	-0.518321
RPUSD1	-0.518248
GALNTL5	-0.517675
IL19	-0.517428
GOLPH3L	-0.516786
DNAJA1	-0.516726
DEDD	-0.515689
KRTCAP2	-0.515656
E2F1	-0.515001
UFD1L	-0.514087
NDUFC1	-0.513921
CNOT3	-0.513896
TRMT1	-0.513058
TFDP1	-0.512547
CXADR	-0.512279
LYPLA2	-0.512021
UFC1	-0.511725
GATAD2B	-0.511644
C16orf91	-0.511642
ZNF324	-0.511523
JTB	-0.511195
MPP6	-0.511047
TUBGCP3	-0.510805
MUC16	-0.510162
KIF9	-0.510137
SHB	-0.510109
CLDN23	-0.509863
SP110	-0.509466
TXNL4A	-0.509452
C18orf1	-0.508536
CNOT10	-0.508179
ILKAP	-0.507915
TRABD	-0.507669
CNIH4	-0.507317
ITPR1	-0.507127
PITPNM3	-0.506898
ROPN1	-0.506001
C7orf44	-0.504754
CAMK1D	-0.504272
GCLM	-0.504186
RASGEF1B	-0.504153
NRTN	-0.504151
TMEM37	-0.50407
FLAD1	-0.503104
SNX27	-0.502274
ZFYVE19	-0.501946
SLC39A4	-0.501135
EXOC8	-0.500376
MGAT4B	-0.498908
LRRC37A3	-0.498556
CFHR5	-0.498509
LRP8	-0.498362
DOCK9	-0.498003
NFYC	-0.497545
PEF1	-0.49721
FAM182B	-0.49719
SPATA5L1	-0.496793
MAZ	-0.496712
TRANK1	-0.496626
C21orf91	-0.496471
YY1AP1	-0.496409
SLC4A11	-0.496354
ZNF684	-0.496193
PEX5	-0.495795
EDEM3	-0.495545
TMEM165	-0.495408
HDGF	-0.495327
TOE1	-0.495298
HMGA1	-0.494535
AKIRIN1	-0.49449
INO80E	-0.494475
HECA	-0.494247
HIATL1	-0.494166
MYOM3	-0.493025
BNIP2	-0.492517
DTL	-0.492284
TRIM11	-0.491119
TMEM85	-0.49111
HAUS4	-0.491057
MRPS34	-0.49097
GUK1	-0.490955
BCO2	-0.490916
ASPHD1	-0.490175
WDR76	-0.49015
C1orf55	-0.490049
OTUD7B	-0.489739
DNAJC1	-0.489619
MTIF2	-0.489596
EZH2	-0.489385
MUTYH	-0.489291
C19orf60	-0.489056
MAPKAPK3	-0.488982
RGL4	-0.488449
CDK5	-0.488233
CCDC142	-0.487979
RGS14	-0.487318
NDUFA9	-0.486985
MTG1	-0.486939
MGC12982	-0.486654
DBI	-0.486531
EPB41	-0.486116
APH1A	-0.486044
EIF2AK1	-0.485867
POLR1E	-0.485255
RAD51AP1	-0.485119
BST2	-0.484794
FAM82A2	-0.484665
CHP	-0.484215
STXBP2	-0.484029
ATP1B1	-0.483838
MYD88	-0.483736
FAM32A	-0.483722
TP53BP2	-0.48372
TMEM53	-0.483632
SRD5A3	-0.483417
TARBP1	-0.482737
GEN1	-0.482722
PUSL1	-0.482179
DNAH7	-0.481493
AQP3	-0.481478
CTDSPL	-0.481352
PPP1R14C	-0.480868
UBAC1	-0.479365
POLR3K	-0.479019
TMCO1	-0.478374
NTHL1	-0.478196
HRASLS	-0.478075
C15orf41	-0.478033
C12orf4	-0.478028
SSBP1	-0.477978
CYP4Z1	-0.477525
LSM10	-0.477485
TEAD4	-0.476568
INF2	-0.476155
OSBPL5	-0.47609
DDX59	-0.476015
FAM125A	-0.47596
RPL10L	-0.475812
PCDH15	-0.475718
RNF19B	-0.475284
CHAC2	-0.474913
AGFG1	-0.474784
KCNIP4	-0.474061
NAGPA	-0.473635
EFCAB7	-0.473455
MARK4	-0.472916
ARPC5	-0.472688
PSMD4	-0.472682
DLEU1	-0.472565
MECR	-0.472418
KIAA1009	-0.472396
TM9SF2	-0.471998
UBAC2	-0.471298
GUCY1B3	-0.470711
POLR2F	-0.470538
C9orf100	-0.470043
ACBD6	-0.469965
GLUL	-0.469874
SSR2	-0.469446
SLC1A3	-0.468921
MLLT4	-0.468502
F12	-0.467887
ITGB3BP	-0.467794
IRF2BP2	-0.467475
CPNE2	-0.466608
MRPL9	-0.466552
POGK	-0.466382
COL24A1	-0.466058
CHI3L1	-0.466017
SH3GL2	-0.465486
SPAG11B	-0.465136
HECTD3	-0.464024
PIWIL1	-0.463331
ZBTB7B	-0.463327
POLD1	-0.462992
MOBKL2B	-0.462409
PALB2	-0.462384
ITGB8	-0.462196
RAB27B	-0.46166
STUB1	-0.461657
XPR1	-0.461646
TOMM22	-0.461467
SETDB1	-0.461181
CHI3L2	-0.461145
ZBTB5	-0.460506
DYDC2	-0.46047
KIF21B	-0.460171
UGT8	-0.459846
GPATCH3	-0.459803
LY75	-0.459472
PIK3AP1	-0.45927
DNAJB1	-0.459053
RSAD2	-0.458729
EBNA1BP2	-0.458609
SAMD4B	-0.458527
IQGAP2	-0.458449
GTF2B	-0.458226
EML3	-0.458015
USP1	-0.457956
ZNF154	-0.45789
EIF3A	-0.457722
PCDHGC4	-0.457533
DAPP1	-0.457498
GSDMC	-0.457256
UBAP1	-0.456651
FAM96A	-0.456387
VIP	-0.456005
DOCK2	-0.455998
NDUFS5	-0.455861
GALR1	-0.45572
NPY	-0.455717
SASS6	-0.455715
TUBA4A	-0.455614
INPP5A	-0.455591
CLEC16A	-0.455323
ACSL6	-0.455316
IFIH1	-0.454989
MPZL1	-0.454794
DCLRE1A	-0.45463
C20orf118	-0.454605
SLCO4A1	-0.454435
ANKS6	-0.454143
SSX2IP	-0.454143
PUS10	-0.453962
KCNG3	-0.45394
CYP1B1	-0.453853
TMEM48	-0.453771
MRPL32	-0.453634
IGSF8	-0.453578
PDGFD	-0.453507
MIOS	-0.453353
SUPV3L1	-0.453206
MYH13	-0.452997
EMG1	-0.452727
TLE6	-0.452381
CCDC11	-0.452364
NUSAP1	-0.452189
FAM49B	-0.451867
C9orf93	-0.451346
HTR2B	-0.451309
PRPF38A	-0.451245
NCOA7	-0.450811
EZR	-0.450759
HNRNPR	-0.450637
DDX56	-0.450538
UGGT2	-0.450435
SIPA1	-0.450337
LAP3	-0.450184
CHMP4B	-0.449799
C14orf86	-0.449588
SCAMP3	-0.449497
CTPS	-0.448972
C19orf43	-0.448604
BCR	-0.448146
ADAT3	-0.447907
PGBD5	-0.447781
ZFAND2B	-0.447768
CWC22	-0.447418
C16orf59	-0.447369
FAM49A	-0.44735
KCNJ4	-0.447151
KLF4	-0.446868
THSD7A	-0.446711
C15orf48	-0.446592
LDLRAP1	-0.446239
PALMD	-0.446017
FH	-0.445978
BPNT1	-0.445633
FAM54A	-0.445569
C7orf54	-0.445535
MKI67IP	-0.445323
PITPNM1	-0.444897
HPSE	-0.444636
CLN3	-0.444321
LEMD1	-0.444294
INTS7	-0.443893
PYGO2	-0.443864
NOP58	-0.443694
RPP25	-0.443438
GPR153	-0.44342
BTG3	-0.442877
EGOT	-0.442333
AZGP1	-0.442316
GLMN	-0.44223
TANK	-0.441916
NENF	-0.441904
IL6R	-0.441787
BOLA3	-0.441774
ZNF672	-0.441764
C4orf38	-0.441599
NDUFAB1	-0.441557
PITPNB	-0.441491
DRAM2	-0.441366
IGFALS	-0.441363
SORBS1	-0.441029
LCN2	-0.440944
FBXL19	-0.440778
TPM3	-0.440751
GCNT4	-0.440566
GFER	-0.440443
NOP10	-0.440222
HAX1	-0.440205
FGF7	-0.440122
PPPDE2	-0.440089
SLC45A3	-0.44002
LRRC45	-0.439976
C1orf85	-0.439782
ETAA1	-0.438931
VRK1	-0.438764
COPS7B	-0.438665
KIAA0907	-0.438662
ANGEL2	-0.438386
LIMCH1	-0.438336
CEBPZ	-0.438274
PLEKHN1	-0.43793
ADPRHL2	-0.437923
ZCCHC17	-0.437839
OSBPL6	-0.437801
ZDHHC6	-0.437765
PCBD1	-0.437729
NCAPH2	-0.437602
RPS6KA1	-0.437491
LRRC8B	-0.437356
VPS26A	-0.437179
OIP5	-0.437111
ZNF513	-0.437104
MTAP	-0.436998
CKB	-0.436772
DDC	-0.436651
ASS1	-0.436355
KIF14	-0.436263
OAT	-0.436189
IL21	-0.435917
BRP44L	-0.435834
ST18	-0.435659
C17orf97	-0.43562
C7orf31	-0.435515
FAM173A	-0.435017
ZNF367	-0.434733
CCNO	-0.434606
TIMM17A	-0.434152
NFATC2IP	-0.433956
SNAP29	-0.43387
C4orf52	-0.433742
CDCA7	-0.433656
CDC42EP4	-0.433639
WTAP	-0.433483
RASL11A	-0.433372
AGTRAP	-0.433325
DHX32	-0.433116
DNM3	-0.433032
DKFZp434L192	-0.432875
ZMYM4	-0.432753
KANK4	-0.432622
ARHGEF16	-0.432602
VILL	-0.432402
SERBP1	-0.43211
YOD1	-0.431182
CSPG5	-0.431099
DCUN1D2	-0.430974
TOR1AIP1	-0.430863
PSTK	-0.43065
POU5F2	-0.430361
RCL1	-0.429971
CXCL11	-0.429859
TFCP2L1	-0.429264
IL17RA	-0.429178
DLK1	-0.428913
FAM192A	-0.428779
CASP1	-0.428631
FARSA	-0.42839
PDE6C	-0.428065
POLR2I	-0.428064
NOP2	-0.427764
C10orf46	-0.427703
TTC13	-0.427621
SOS1	-0.427595
SPNS3	-0.42732
SMG7	-0.42728
CREB3	-0.426862
PSMB4	-0.426811
TAGLN2	-0.426367
GMEB1	-0.426349
FABP1	-0.426275
NDUFA3	-0.426242
C8orf22	-0.426106
TFR2	-0.425894
SIGLEC5	-0.425832
SMOC1	-0.425536
C14orf142	-0.425455
IGFL1	-0.425451
MRPL37	-0.425321
SYCP2L	-0.42512
SEMA3F	-0.424894
NOC2L	-0.424792
KCMF1	-0.424724
GON4L	-0.424704
TCF7L2	-0.42466
AZI1	-0.423896
NR1H3	-0.423624
SP6	-0.423092
PPP2R5A	-0.422957
NANOS1	-0.422946
C1orf35	-0.422733
AIM1L	-0.422663
GRIN3A	-0.422596
OR2K2	-0.42232
KIAA1432	-0.422052
C11orf75	-0.421513
BCL7C	-0.421367
LAMA4	-0.421318
NCCRP1	-0.421216
DTX4	-0.420813
FAM83F	-0.420393
LYVE1	-0.420006
BFSP1	-0.419816
ZNF283	-0.419669
LOC441666	-0.419577
RPL11	-0.41952
C9orf82	-0.419518
VNN1	-0.419253
SNORA68	-0.41916
FAF1	-0.419021
SLC22A18AS	-0.418894
CYP39A1	-0.418552
CISD1	-0.418439
FAM40A	-0.418307
UTP11L	-0.418245
OPN3	-0.417968
C4orf14	-0.417961
AK2	-0.417495
VANGL2	-0.417031
RHBDL2	-0.416867
ITPA	-0.416835
HEATR2	-0.416656
L3MBTL4	-0.416651
RPS19BP1	-0.416543
PI3	-0.416145
MRPL18	-0.415528
MSH2	-0.41508
SPR	-0.415068
CCL5	-0.414844
TIPRL	-0.414459
CLGN	-0.414236
CPA5	-0.41384
ATP13A2	-0.413735
IFT172	-0.41367
TAS2R39	-0.41361
CAPN10	-0.413607
C10orf35	-0.413564
PTAR1	-0.413538
GBGT1	-0.413482
TGDS	-0.413367
MCAT	-0.413269
SYCE1L	-0.412994
DFFB	-0.412643
TMEM39B	-0.412544
CMTM8	-0.412414
THAP7	-0.412354
LOC100129935	-0.412002
SLC19A3	-0.411794
ELK4	-0.411578
OSBPL3	-0.411534
CUL1	-0.411412
HMGN3	-0.41138
ALOX5AP	-0.411129
MTBP	-0.411112
KIAA1671	-0.411107
POLM	-0.410792
C16orf57	-0.410739
ZNF787	-0.410593
SLC25A33	-0.410498
SLC25A19	-0.410463
PHOX2B	-0.410116
TRAF2	-0.410085
SRP72	-0.410013
SCEL	-0.409953
PDSS1	-0.409681
FER1L5	-0.40966
EGLN1	-0.40959
SMCR7L	-0.409569
CMPK2	-0.409549
KIAA2026	-0.409544
C1orf220	-0.409489
GCHFR	-0.409419
PAK1IP1	-0.409282
RFX5	-0.409273
ARMC10	-0.409127
RASAL2	-0.408822
DPP4	-0.408811
URB2	-0.408719
EXO1	-0.408622
MLKL	-0.408601
PLEKHF1	-0.408545
TTPA	-0.408425
CX3CR1	-0.408319
RELL2	-0.408259
MKLN1	-0.407946
C1orf109	-0.407944
PLAA	-0.407778
TMEM9	-0.407394
CDR2L	-0.407282
ST8SIA1	-0.407201
PPM1G	-0.407177
CCDC75	-0.407092
WFDC3	-0.406783
SLC35D3	-0.406568
ITPKA	-0.40635
METTL13	-0.406338
C10orf125	-0.40633
MT1F	-0.406282
LITAF	-0.406256
WDR24	-0.405993
DRG1	-0.405762
ZNF646	-0.405713
PPP1R15B	-0.405473
BID	-0.405436
DMBX1	-0.404977
SGOL1	-0.404954
ACTL8	-0.404869
ATP13A1	-0.404719
NDUFA13	-0.404503
MCC	-0.404393
BAHD1	-0.404309
SAMD1	-0.404257
DEFB1	-0.404215
HOXC12	-0.404025
RAB11FIP2	-0.40402
ZNF205	-0.403894
EYA2	-0.403849
POLD2	-0.403527
AES	-0.403333
CIAPIN1	-0.403244
S100A12	-0.403167
RPL38	-0.403065
ZDHHC13	-0.403027
MRPL40	-0.403022
MTNR1A	-0.403008
CASC2	-0.4029
PRDM7	-0.402884
ACP6	-0.402683
TCIRG1	-0.402647
MYBL2	-0.402528
C1orf87	-0.402487
PTGER2	-0.402425
BCL2L12	-0.402405
VNN3	-0.402202
QPCT	-0.401925
LPGAT1	-0.40189
TRMT11	-0.40154
ESRRA	-0.401316
GNAL	-0.401307
AQP4	-0.400922
DCTPP1	-0.400759
CHAF1B	-0.400711
SNRNP40	-0.400445
ZNF384	-0.400438
SF3A1	-0.400365
VPS35	-0.400222
MAP7D1	-0.399646
PRR14	-0.399553
MST1R	-0.399431
SEMA3E	-0.399311
C9orf41	-0.399291
MCART1	-0.399228
MFSD4	-0.399149
ASNA1	-0.399064
POLR3E	-0.398918
ATF3	-0.39873
HEBP2	-0.398682
DENND4C	-0.398339
NKAPL	-0.398276
CARD16	-0.398185
MYH6	-0.397999
SMAD6	-0.39763
PSORS1C2	-0.397605
BUB1B	-0.397375
HSD17B2	-0.397346
SYT12	-0.397322
LOC284788	-0.397237
CNKSR1	-0.397169
CDC7	-0.397102
C9orf25	-0.39707
ZHX1	-0.396847
SNAPIN	-0.396741
DPM3	-0.396587
GTF2A2	-0.396551
C19orf40	-0.396347
GNG5	-0.396337
SRRT	-0.396291
DNAH17	-0.396247
DENND4B	-0.396176
SOLH	-0.39606
STRN	-0.395801
NTSR1	-0.395788
TRUB1	-0.395618
RDH13	-0.395011
TNFRSF11A	-0.394939
ATP6V1B1	-0.394911
ARHGAP30	-0.394799
TMEM65	-0.394547
CBLC	-0.394453
CORO2A	-0.394405
DEXI	-0.394284
LCE2B	-0.394119
2018-09-03	-0.394089
PNKP	-0.393934
KIAA1147	-0.393895
TPST2	-0.393372
GDA	-0.393002
CP	-0.392993
ARV1	-0.392929
CUL4A	-0.392798
ACYP2	-0.392651
ANKRD54	-0.392485
KCNS3	-0.392429
ATP1A1	-0.392423
CD209	-0.392262
C9orf86	-0.392068
SEC14L4	-0.391951
SEZ6L2	-0.391948
NDUFB7	-0.391784
FAM40B	-0.391651
E2F8	-0.391646
PGP	-0.391502
IMPA2	-0.39143
GCC1	-0.391322
MKI67	-0.391298
DPH5	-0.391212
CCDC106	-0.390959
STK24	-0.390849
ARL8A	-0.390808
PFDN2	-0.390804
TELO2	-0.390776
SP8	-0.390572
SETDB2	-0.390505
MRPS5	-0.390495
IL22RA2	-0.390422
MOCOS	-0.390362
TECRL	-0.39021
TFAP4	-0.390166
MYCN	-0.390032
RWDD3	-0.389977
EXOSC8	-0.389961
RILP	-0.3899
PWWP2B	-0.389896
TFEB	-0.389743
OAF	-0.389666
ALDOA	-0.389644
PLEKHA1	-0.38957
BPESC1	-0.389541
ZBTB8OS	-0.38946
TXNRD1	-0.389446
LOC728024	-0.389389
IFNGR1	-0.389076
S100A11	-0.38881
NFKBIA	-0.388797
RBM34	-0.388759
COQ10A	-0.388648
MTF1	-0.38863
NOL8	-0.388389
LSM4	-0.388322
RHEB	-0.388165
NKD1	-0.388137
STX19	-0.388132
MFN2	-0.388124
SLC25A2	-0.387915
C19orf50	-0.387713
MAGOH	-0.387569
IRGC	-0.387545
PLK3	-0.387504
PRR19	-0.387481
PDE4B	-0.387327
DTX2	-0.387101
MRPL20	-0.387049
BRMS1	-0.387047
UNKL	-0.386788
C6orf115	-0.386773
RAPGEF5	-0.38663
PROM1	-0.386543
RHBDF2	-0.386505
MED26	-0.386452
FANK1	-0.386079
NARFL	-0.386066
UBE2I	-0.385844
SNORA61	-0.385718
CSRNP1	-0.385536
CLTB	-0.38553
FREM1	-0.385313
BOLA1	-0.385212
ZFAND5	-0.38491
LYPLAL1	-0.384886
EPHX1	-0.384669
CPVL	-0.38451
GRHL3	-0.384499
UCHL1	-0.384468
IGJ	-0.384402
C1orf227	-0.384402
ISG15	-0.384278
PIM3	-0.384223
NFKB1	-0.384019
ASB2	-0.383963
ATP6V0C	-0.383718
CA10	-0.383655
ELMOD1	-0.383647
DSN1	-0.383456
MIER1	-0.383417
BCL9	-0.38341
SPATA1	-0.383391
PPP1R8	-0.383363
C1orf212	-0.383358
PVRIG	-0.383261
IPO9	-0.383223
CYBA	-0.383186
ISYNA1	-0.382975
GMPPB	-0.382969
NOL10	-0.382966
OIT3	-0.382828
SQRDL	-0.382806
TSPO	-0.382431
LMTK2	-0.382372
AP4M1	-0.382354
EIF2C1	-0.382182
UPF3A	-0.381994
AHDC1	-0.381822
IRF7	-0.381813
2018-09-01	-0.381037
RNF187	-0.380628
RGS2	-0.380534
FAM26D	-0.380278
ST6GALNAC4	-0.379776
STX6	-0.379505
GMIP	-0.379502
LOC388796	-0.379475
PATE1	-0.379469
SPSB2	-0.37937
PTPN18	-0.379302
SLC25A13	-0.379284
C15orf62	-0.379168
HORMAD1	-0.379026
RAB4A	-0.378652
PTGS1	-0.378628
THOC6	-0.378385
FASTKD1	-0.378337
ANKRD39	-0.378257
UNC5A	-0.378223
SNRPD3	-0.377937
PM20D2	-0.377751
FBLN2	-0.37765
ACN9	-0.377467
TRIM69	-0.377464
CDC37L1	-0.377339
APOA1BP	-0.377311
ADIPOR1	-0.377115
C6orf208	-0.377016
HIST1H4A	-0.376826
PPT1	-0.376566
UBE2M	-0.376507
RPA2	-0.376496
OR2H2	-0.376458
M6PR	-0.376396
OBP2B	-0.376377
NEK3	-0.376311
YDJC	-0.376213
MIAT	-0.376101
GALE	-0.376097
LRRC6	-0.37603
CHCHD10	-0.375899
MRPS12	-0.375802
ART3	-0.37564
TMEM100	-0.375636
EIF3K	-0.375612
TEKT2	-0.37548
HUS1	-0.375435
SRCAP	-0.375387
PPP4C	-0.37534
CD163	-0.375164
ARHGEF2	-0.375102
WASL	-0.375071
BIK	-0.374877
OAS1	-0.374667
MAP3K4	-0.374613
MTA2	-0.374577
C2orf71	-0.374206
CCDC68	-0.374051
C7orf30	-0.373966
ISLR2	-0.37382
MCM5	-0.373815
C20orf197	-0.37376
CORO1A	-0.373737
SPATA12	-0.373708
ADAMTS17	-0.37364
RCOR3	-0.373457
RAB8A	-0.373414
OR7A17	-0.373239
WDR67	-0.373184
LPCAT2	-0.373129
NGEF	-0.372938
LOH12CR1	-0.37292
PLA2G4A	-0.372692
ANKRD16	-0.372431
KLHL7	-0.372212
FOXJ3	-0.371768
TLR1	-0.371667
ZNF271	-0.371665
ALDH1A3	-0.371553
KIAA0319L	-0.371473
PIK3R6	-0.371411
CCDC77	-0.3713
MFSD9	-0.371278
TMEM87A	-0.37111
C12orf45	-0.370925
JMJD4	-0.370774
CASP14	-0.370686
TFPT	-0.370675
RNASE6	-0.370666
FAM181A	-0.370598
MRPL34	-0.370597
CLYBL	-0.370521
FHOD1	-0.370431
TROVE2	-0.370323
ADCK2	-0.37025
GGA3	-0.370172
TEK	-0.37014
SLC1A6	-0.37007
MUC15	-0.36985
MAFK	-0.369789
C11orf9	-0.36976
SMC6	-0.369718
GPM6A	-0.369698
LARP4B	-0.369619
SOX7	-0.369615
TMED5	-0.369424
S100A7A	-0.369265
PSMB2	-0.368973
DSCC1	-0.368966
SESTD1	-0.368817
DIRAS3	-0.368526
LGALS9	-0.36847
CCND3	-0.368312
ADAM15	-0.367894
GNL2	-0.367763
ST6GALNAC1	-0.367445
TOR1AIP2	-0.367444
PKN3	-0.367426
LOC285419	-0.367313
ABHD3	-0.367164
SH3BP4	-0.366702
C1orf43	-0.366653
ACP2	-0.366353
ATOX1	-0.366235
CSTT	-0.366094
TOMM7	-0.365975
DDIT4L	-0.365852
CHST11	-0.365776
FGF10	-0.365658
ZNRF3	-0.365412
KPNA6	-0.3653
SH2D2A	-0.3652
CCDC93	-0.365155
FLYWCH1	-0.365098
AIMP1	-0.364935
TRIM41	-0.364888
KCNAB2	-0.364852
SUGT1	-0.364774
VPS36	-0.364665
UROS	-0.364657
DDX18	-0.364634
ADORA1	-0.364555
CSNK2A2	-0.364479
RPS16	-0.364472
SCO2	-0.364425
EPHB6	-0.364262
KRT6B	-0.364194
FAM124A	-0.364156
TLE1	-0.36413
NCL	-0.364025
ZDHHC14	-0.363986
INTS12	-0.363977
C9orf85	-0.363929
C1orf100	-0.363499
ARNT	-0.363443
MRPL11	-0.363299
CCDC136	-0.36304
C22orf25	-0.36299
DNAJC2	-0.362815
SF3B4	-0.362812
RIT1	-0.362431
GNE	-0.362429
PTPRN	-0.362261
IQCA1	-0.362181
PLIN1	-0.362126
CD1D	-0.362112
PMVK	-0.361992
EGLN3	-0.361902
WBSCR17	-0.361838
NEK2	-0.361838
PTK2B	-0.361771
MPHOSPH10	-0.361658
ETHE1	-0.361624
UTF1	-0.36154
CYB5RL	-0.361336
AP1B1	-0.36128
DGCR8	-0.361266
SULT1E1	-0.36122
MAL	-0.361116
CBFB	-0.361048
MBD5	-0.361013
GCNT2	-0.360944
WDR91	-0.360909
RSPH3	-0.360882
TXNRD2	-0.360432
PYCR2	-0.360383
C1QTNF1	-0.360164
CDC123	-0.360021
SLC25A22	-0.359917
BAG1	-0.359749
C1orf131	-0.359672
CHTF18	-0.359669
SOCS6	-0.359652
FAM100B	-0.359357
FAM195A	-0.359311
CCT3	-0.359271
PQLC1	-0.359157
TM4SF1	-0.358754
TTC9	-0.358567
TSGA13	-0.358241
TAC1	-0.358044
MEPCE	-0.357972
DPP6	-0.357903
PGLS	-0.357792
HS3ST5	-0.35754
EIF3J	-0.357449
LGR6	-0.35743
IDH3B	-0.357401
RBM15B	-0.357117
CABP1	-0.357068
IFNE	-0.356971
COMTD1	-0.356946
PRDX1	-0.356808
SGCE	-0.356746
COQ7	-0.356689
EFNA1	-0.356545
FAM45B	-0.356527
NEURL3	-0.356516
KCNC4	-0.356365
NUBP1	-0.356313
B3GNT2	-0.356279
SOX17	-0.356074
SLC2A11	-0.356044
HNRNPK	-0.356024
ELF2	-0.355961
ECHS1	-0.355931
SLC10A4	-0.355802
B4GALNT3	-0.355576
AIM1	-0.355532
ZFP36L2	-0.355472
MRPL51	-0.355274
PARP1	-0.355101
TBRG4	-0.35504
POLR1A	-0.355009
RNF165	-0.354899
BCS1L	-0.354812
RDH10	-0.354773
SLC30A7	-0.354757
CYB561D2	-0.354735
APOL5	-0.354716
GADD45GIP1	-0.354594
ZNF80	-0.354498
RPA3	-0.354395
RPL37A	-0.354355
COLEC10	-0.354314
GAPDH	-0.354253
DUOXA1	-0.35412
KIAA0020	-0.354056
MARCO	-0.354034
CAPZA2	-0.353999
SLC2A3	-0.353955
PRG4	-0.353729
DMAP1	-0.353662
SLC44A3	-0.353122
LARP7	-0.35311
PARP2	-0.353055
ZNF598	-0.352822
RASIP1	-0.352741
DCK	-0.352733
NDUFS2	-0.352408
LPAR5	-0.352389
FAM184A	-0.352387
SLC25A31	-0.35224
CASP4	-0.352236
IL33	-0.352184
POLR2C	-0.352141
EGR1	-0.352067
SSH2	-0.351854
NIPA2	-0.35185
GPR56	-0.351607
HOXC13	-0.351523
SDC1	-0.351477
FGFR1OP	-0.351452
CLINT1	-0.351433
RUNX3	-0.35141
ABCA17P	-0.351371
FUT9	-0.351031
MDH1	-0.350995
C10orf113	-0.350976
AK1	-0.350816
RNF213	-0.350765
EIF2B3	-0.350681
HYAL4	-0.350361
DDX49	-0.350225
ZNF691	-0.350153
GRSF1	-0.350122
LOC374443	-0.3501
POLR3G	-0.350079
LYNX1	-0.349955
TRAF7	-0.349938
PROKR2	-0.349551
IRF1	-0.34947
SNORA71B	-0.349347
NPM1	-0.349188
RNF220	-0.349102
DEGS1	-0.349075
CALB1	-0.349041
NSL1	-0.349029
PSMA2	-0.348982
KLK9	-0.348887
PPA1	-0.348743
SLBP	-0.348631
TCP1	-0.348597
RPF1	-0.348444
NUP85	-0.348394
RCC1	-0.348012
POU2F3	-0.347933
TUBGCP4	-0.347883
TPP2	-0.347869
C9orf123	-0.347858
PCSK5	-0.347851
LTBR	-0.347814
RANGRF	-0.347422
FBL	-0.347317
FAM83D	-0.347217
PLEKHG1	-0.3472
PKHD1L1	-0.347137
RTKN2	-0.346995
ANO8	-0.346955
CLEC7A	-0.346861
NUCKS1	-0.346389
RPAP1	-0.346297
LSM5	-0.346043
AGAP1	-0.345969
TRIM47	-0.345845
IARS2	-0.345794
C1orf112	-0.34554
WNT10A	-0.345132
IPPK	-0.345059
OASL	-0.34494
UNC93B1	-0.34492
TRNAU1AP	-0.344898
C16orf87	-0.344738
TMEM19	-0.344722
C13orf15	-0.344601
EXOSC9	-0.344278
MYL6B	-0.344247
OGFOD1	-0.344181
TGM1	-0.343973
MYC	-0.343919
LMO1	-0.343769
CSTB	-0.343704
KRTCAP3	-0.343635
HBXIP	-0.343585
FAM131B	-0.343542
CHN2	-0.343524
PDE1A	-0.343479
DENND1C	-0.343441
PLK1	-0.343424
SLC27A5	-0.343382
KDM4C	-0.343225
WARS2	-0.343199
CLSPN	-0.343116
POU2AF1	-0.343089
ZNF642	-0.343058
SETD6	-0.343046
LOC285954	-0.342849
AHI1	-0.342816
ATP5C1	-0.342812
BCL11A	-0.342763
INO80	-0.342667
PROM2	-0.342501
CEP350	-0.342436
PSMD8	-0.342414
STARD7	-0.342353
COX6B1	-0.342258
NOX4	-0.342199
LECT1	-0.342045
COPE	-0.341791
BNC1	-0.341652
ALG6	-0.341537
C10orf54	-0.341298
MRPS31	-0.341255
CDCA7L	-0.341251
CALM2	-0.341248
NFYB	-0.341113
MKNK2	-0.340989
IL4R	-0.340914
TMEM232	-0.340896
UBE2L3	-0.340854
FAM83A	-0.340559
TTLL4	-0.340397
PDIK1L	-0.340274
OAZ3	-0.340115
PLAGL1	-0.340087
HELB	-0.34003
SHISA6	-0.339948
RMI1	-0.339869
PPARGC1B	-0.339767
SPACA3	-0.339683
WBP11	-0.339575
VTI1A	-0.339434
NADK	-0.33925
GM2A	-0.339106
MT2A	-0.339087
RFXANK	-0.338841
FLJ35776	-0.33884
ZNF586	-0.338766
CCDC138	-0.338731
SERPINB7	-0.338592
OBFC2B	-0.338485
NCDN	-0.338357
WDR49	-0.338337
ZDHHC21	-0.338121
FANCL	-0.338043
NOXO1	-0.337944
EPS8L1	-0.3378
ZCCHC6	-0.337698
RAD23A	-0.33765
SEPW1	-0.337633
ANP32E	-0.337632
TMEM51	-0.337621
CENPL	-0.33727
KLRG1	-0.337231
GLB1L3	-0.337216
IQGAP3	-0.337144
ELMO1	-0.337062
RABGGTB	-0.336982
RNF157	-0.336938
NUDT2	-0.336892
CASP8	-0.336858
ASF1B	-0.336443
CNTN6	-0.336425
C11orf94	-0.336407
FBXL18	-0.336354
ZBTB48	-0.336284
RBBP4	-0.33628
KATNA1	-0.336262
PCSK1	-0.336152
ASCC2	-0.336083
AP1S3	-0.335855
PHLDA2	-0.335713
PTP4A2	-0.335693
MT1X	-0.335552
PGM2	-0.335528
C15orf33	-0.33545
ATP4B	-0.335447
LIAS	-0.335379
TRIM56	-0.335301
NR2C2AP	-0.335259
LAD1	-0.335184
TLK1	-0.335127
C1orf122	-0.335119
CADM4	-0.335108
MRPL24	-0.33508
C3	-0.334819
C12orf26	-0.33476
TSPAN9	-0.334686
CTDSP1	-0.334619
PASK	-0.334583
ZNF326	-0.334336
FOXO1	-0.334331
KIAA0564	-0.334032
RALY	-0.333827
EIF2AK2	-0.333787
C9orf69	-0.333737
NMRAL1	-0.333682
EEF1E1	-0.333439
SNUPN	-0.333278
SPRY1	-0.332961
ODF2L	-0.332896
PSPC1	-0.332542
KIAA0649	-0.332452
TBL3	-0.332391
SLC28A3	-0.332156
ZNF391	-0.332024
CCDC13	-0.33194
RASAL1	-0.331922
STRN4	-0.331868
CCDC124	-0.331792
RAD9B	-0.331789
ZNF169	-0.331488
ALG1	-0.331419
CDK8	-0.331381
DOCK4	-0.331289
FAM165B	-0.331283
TDO2	-0.331055
ZWINT	-0.331036
RPL5	-0.331007
HOXB1	-0.331004
SH2B2	-0.330984
ZBED4	-0.330852
IMP4	-0.330763
MAST3	-0.330738
C15orf56	-0.330712
TATDN3	-0.330703
RTP4	-0.330524
TNFRSF1A	-0.330391
DLD	-0.330333
SMPD2	-0.330292
ZNF394	-0.330261
B2M	-0.330255
TMEM198	-0.329968
DDX58	-0.329935
C4orf7	-0.329826
NCAPD2	-0.329814
RMND5A	-0.329741
CCT4	-0.329717
MTERFD2	-0.329636
USP33	-0.329613
NKG7	-0.329548
IFT52	-0.329393
DUSP12	-0.329221
DCAF8	-0.329147
ARAP2	-0.328978
MSMB	-0.32885
IL20RB	-0.328839
MFF	-0.328599
LOC283050	-0.328525
CALML5	-0.328335
PPPDE1	-0.328287
FAM116A	-0.328207
ARRDC2	-0.328094
ICOS	-0.328036
HDHD3	-0.327916
LAIR1	-0.327789
XDH	-0.327674
FHL3	-0.327525
GALNT7	-0.327516
CCL7	-0.327512
IL3	-0.327303
DTNB	-0.327289
PSMB10	-0.327219
DYNLT1	-0.327158
GNB1L	-0.326875
LOC145845	-0.326658
PTPRU	-0.326479
RPS11	-0.326393
DAPK1	-0.3263
A2ML1	-0.326093
GAR1	-0.325922
E4F1	-0.325865
SH2D4A	-0.325818
ERCC3	-0.325705
CCDC18	-0.325687
TRAT1	-0.325656
SNHG3	-0.325602
ABCB1	-0.325464
MFSD2A	-0.325462
VPS13A	-0.325149
PNLIPRP3	-0.325013
ZNF677	-0.324964
LRRC8D	-0.324616
PON2	-0.324539
TLN1	-0.32448
WDR62	-0.324387
H2AFZ	-0.324331
NUP35	-0.32417
ETV6	-0.324106
LHFPL3	-0.323889
LOC150381	-0.323877
S100A2	-0.323823
ATP6V1C2	-0.323816
C1orf135	-0.323771
BHMT2	-0.323764
LRWD1	-0.323718
SLCO2A1	-0.323705
GLYATL2	-0.323528
EDN2	-0.323482
MRPS7	-0.323472
ADI1	-0.323438
EPAS1	-0.323434
NPVF	-0.32327
PABPC4	-0.323232
TINAGL1	-0.322843
SPSB1	-0.322821
UBN2	-0.322803
TAF5L	-0.322692
CILP2	-0.322682
DNAH3	-0.322681
ZNRF2	-0.322243
RTP3	-0.322163
C7orf40	-0.322156
ASH1L	-0.322085
TMEM201	-0.322074
DENND1B	-0.322063
TESK1	-0.321887
IFRD2	-0.321869
GNPAT	-0.32183
TCF20	-0.321752
GGA2	-0.321502
RAB11B	-0.321354
MAST2	-0.321281
SLC5A9	-0.321122
BTBD8	-0.321039
MDFI	-0.320985
POU2F1	-0.320864
RTTN	-0.320864
CLCF1	-0.320731
SPC25	-0.320603
SPINK7	-0.320502
NAIF1	-0.320457
ADRB1	-0.320402
PRKAR2B	-0.320219
COX7A2L	-0.320141
PPP1R12C	-0.320138
TUSC1	-0.320008
TMEM185B	-0.31993
PKN2	-0.319894
RTN4R	-0.319872
CNFN	-0.319823
CA5A	-0.319584
CYP7B1	-0.319537
MAT2A	-0.319455
ALG5	-0.319386
UROD	-0.319314
ZMYM1	-0.319244
SRBD1	-0.31894
NR3C1	-0.318919
NAALADL1	-0.318907
NUDT6	-0.318891
C3orf22	-0.318891
PDCD5	-0.318871
NUP205	-0.318786
UCHL3	-0.318644
SNAP47	-0.318553
PES1	-0.318311
C8orf42	-0.318303
EWSR1	-0.31828
ST3GAL6	-0.318238
SHISA3	-0.318216
HOXA10	-0.318192
TFPI2	-0.318155
ATN1	-0.318146
GAS7	-0.31804
LYSMD1	-0.318037
DUSP5	-0.317951
CENPM	-0.317912
CCDC135	-0.317897
PCSK9	-0.31787
C9orf140	-0.317837
GLIPR2	-0.317755
FAM53B	-0.317623
CARD6	-0.31737
C22orf13	-0.317301
FLJ11235	-0.317275
PIK3R3	-0.317001
NHP2	-0.317001
KLK7	-0.316985
ZC3H15	-0.316982
GINS3	-0.316927
GNB2	-0.316923
THAP4	-0.316913
CCNF	-0.316663
TSEN54	-0.316572
KRTAP9-4	-0.316398
NAV1	-0.316288
DNPEP	-0.316197
MBOAT2	-0.316108
DLAT	-0.315706
IL27RA	-0.315668
THOC1	-0.315601
FAM76B	-0.315601
HNRNPC	-0.315498
C6orf105	-0.315489
S100A14	-0.315434
SSBP4	-0.315389
LRP5L	-0.315379
IL10RB	-0.315351
TDRD1	-0.315253
CDC42EP5	-0.315192
GTPBP3	-0.315178
MTHFD2L	-0.314978
SMYD2	-0.314825
PIGF	-0.314786
KRT75	-0.314786
TLR6	-0.31467
POP7	-0.314639
SPHAR	-0.31463
EIF3I	-0.314531
CLCA4	-0.314342
C1orf50	-0.314257
B4GALT2	-0.314256
INPP5B	-0.31425
LRRC4	-0.314244
AUP1	-0.314141
SPNS1	-0.313681
SQSTM1	-0.313603
KCNQ1	-0.313555
VSTM2L	-0.313478
HSD11B2	-0.313419
DNAJC11	-0.313392
SLC43A3	-0.313358
NUP133	-0.31332
STAMBPL1	-0.312992
ZNF319	-0.312931
MLF2	-0.312764
ELAVL2	-0.312656
MPV17L2	-0.312609
C1orf116	-0.31254
MRPL23	-0.312512
PELI2	-0.312498
WNT6	-0.312496
GDE1	-0.312411
SMC1B	-0.312326
LENG9	-0.312322
ZNF436	-0.312258
YBX2	-0.312107
TFAP2B	-0.312012
C16orf53	-0.311934
BAIAP2	-0.311892
SLC30A1	-0.311843
ANKRD57	-0.311838
HES2	-0.311798
MYLK3	-0.311657
MMACHC	-0.311559
CCDC137	-0.311403
TMPRSS2	-0.311393
UPB1	-0.311248
CXXC1	-0.31121
MTUS2	-0.31119
TRIM28	-0.311165
NFKBID	-0.311095
RIMS3	-0.311055
SNX7	-0.310995
TREML4	-0.310929
FCER1A	-0.310764
GAS2L1	-0.310696
C15orf27	-0.310639
SBF1	-0.310624
FHL5	-0.310623
NID1	-0.310577
SLC35C1	-0.310577
DHDH	-0.310564
COX5B	-0.310538
NOD1	-0.310352
C7orf36	-0.310252
JAKMIP1	-0.310054
MRPL12	-0.309926
RNPS1	-0.309884
CPM	-0.309819
LRRIQ3	-0.309709
SURF2	-0.30969
LRRC57	-0.309638
CH25H	-0.309616
PLTP	-0.30951
TNFRSF12A	-0.309473
CPNE4	-0.30933
RUSC1	-0.309303
MYOC	-0.309144
FOXI1	-0.309038
LOC283761	-0.308966
FBXO43	-0.308666
MAPK9	-0.308632
ATXN2L	-0.308597
KDM5A	-0.308588
IL17RD	-0.308575
PCID2	-0.308556
EFCAB4A	-0.308488
HOXA1	-0.308369
ACAA1	-0.308346
C2orf56	-0.30834
SF3B5	-0.308244
BTN3A3	-0.308181
TXLNA	-0.308129
RFPL2	-0.308101
CCDC109B	-0.308019
CDC42SE1	-0.307998
PRSS27	-0.307982
ZNF524	-0.307978
USP16	-0.30794
SH3BP1	-0.307915
LBP	-0.307828
FAM13A	-0.307801
COL22A1	-0.307731
FAM54B	-0.307635
FZD9	-0.30758
PRELID1	-0.307474
SPRY4	-0.307402
MMP3	-0.307258
REPS1	-0.307139
SDR42E1	-0.307047
PHKG2	-0.306989
GUCA1C	-0.306891
ZMYND19	-0.30689
MRPL54	-0.306842
LGALS2	-0.306818
KCNJ16	-0.306748
CIAO1	-0.306668
GOT2	-0.306604
ZNF324B	-0.306571
HLF	-0.306346
ZIM3	-0.3062
SPEN	-0.306128
C15orf23	-0.305994
FBXL8	-0.305889
GNG4	-0.305883
SALL1	-0.305863
TSHZ2	-0.305858
PLIN2	-0.30573
CCDC24	-0.305643
CAPN3	-0.30562
APOL6	-0.305618
LRRC40	-0.305586
LDHAL6A	-0.305571
CX3CL1	-0.305549
HDAC4	-0.30533
ODF3B	-0.305258
TTC36	-0.305223
TEX15	-0.305126
IRF3	-0.30506
CCDC67	-0.30489
SUPT5H	-0.304848
HAUS2	-0.304804
CLMN	-0.304475
TSC22D4	-0.304352
MON1A	-0.304275
SCMH1	-0.30423
SSU72	-0.304184
DEPDC7	-0.304098
PTPN12	-0.303953
MESP1	-0.303576
TUBGCP6	-0.303371
PLEKHG4	-0.303163
SLC46A3	-0.303112
GTSE1	-0.303103
DEFB129	-0.303096
EML4	-0.303053
HIST1H2BB	-0.30288
ALDH3A1	-0.302872
ECHDC2	-0.302747
EIF3L	-0.302706
CYYR1	-0.302675
SLC6A15	-0.302405
CLEC4GP1	-0.302391
TCEB3	-0.30223
B4GALT3	-0.302111
SBNO2	-0.302099
C9orf156	-0.302092
ACTR5	-0.302084
NOP16	-0.302065
TBC1D8	-0.301995
ZNF208	-0.301696
SEC61B	-0.301497
MIR17HG	-0.301477
PIWIL4	-0.301447
PREB	-0.301439
SUSD4	-0.301217
KLHDC10	-0.301202
MOV10	-0.301181
FGF23	-0.301099
HCFC1R1	-0.301033
SYF2	-0.301005
CXCL2	-0.300934
GALNT12	-0.300894
HSPB9	-0.300844
DHRS3	-0.300732
KIAA1468	-0.300616
KRAS	-0.300615
HJURP	-0.300511
SLC26A9	-0.300368
C7orf23	-0.300241
TNFAIP8L1	-0.300221
MMP7	-0.30009
TSEN34	-0.300074
MPST	-0.29995
SNHG11	-0.299858
PRTN3	-0.29975
C2orf29	-0.299739
IER5	-0.299487
ACOT7	-0.299383
TNFRSF10A	-0.299249
NDUFB10	-0.299178
HIST1H1A	-0.299123
TLE4	-0.299115
C19orf57	-0.299101
RANBP17	-0.299081
STEAP3	-0.299056
FZD6	-0.298956
KCNJ2	-0.298885
CTSO	-0.298826
CCL4	-0.298578
KRTAP3-3	-0.298526
CCL8	-0.298436
RAP2A	-0.29841
CLEC4C	-0.298285
DPY19L2	-0.298209
SAMD9	-0.298051
LPPR1	-0.297929
EPB41L1	-0.29791
ZNF692	-0.297885
C3orf79	-0.297834
LPHN3	-0.297751
MND1	-0.297704
MRPL33	-0.297552
PRKCB	-0.297473
MAP3K2	-0.297458
RFK	-0.297407
GRIP1	-0.297246
HCP5	-0.297223
WWC1	-0.297209
ADRM1	-0.297202
POU1F1	-0.29719
DIAPH1	-0.297177
CLN6	-0.297152
WNK2	-0.297108
APTX	-0.297092
CREG1	-0.29706
TMIGD2	-0.297034
CYP19A1	-0.297033
FES	-0.296895
WDR34	-0.296818
C16orf93	-0.296789
FOXQ1	-0.296777
TPD52	-0.296775
BCL10	-0.296683
CASZ1	-0.296655
MFSD3	-0.296626
SLC25A37	-0.296443
SEPN1	-0.296406
OSGEP	-0.296335
METTL9	-0.296258
NLRC5	-0.296092
ARMC5	-0.295989
RNF138	-0.295971
PRKD2	-0.295946
DHX34	-0.29593
KCNA5	-0.295888
C1orf115	-0.295807
SIM1	-0.295668
RHOG	-0.295661
MTA1	-0.295661
OLFM4	-0.295609
KIAA1522	-0.295609
PSMA8	-0.295567
HIST1H2AL	-0.295493
PILRB	-0.295468
C10orf11	-0.295453
GPAA1	-0.295426
SND1	-0.295349
WDR17	-0.29534
FOXM1	-0.295338
RPAP2	-0.295326
ANKRD13B	-0.295258
MTA3	-0.295245
TMC6	-0.295165
RTF1	-0.295122
FKBP1A	-0.295083
WASF2	-0.295069
OMA1	-0.294949
POM121L9P	-0.294924
KANK1	-0.294885
GMNN	-0.294822
TACR1	-0.294808
RBM26	-0.294752
USP36	-0.294481
NECAB3	-0.294467
TRAF3IP1	-0.294447
TFB1M	-0.294366
NUBP2	-0.294301
FXN	-0.294216
SAP30L	-0.294215
ELF3	-0.29418
MLNR	-0.294148
HSPH1	-0.294126
KRT6A	-0.294111
C1QTNF4	-0.294056
PLEKHA8	-0.293671
TMEM132E	-0.293666
HEMGN	-0.29365
CLOCK	-0.293616
SAV1	-0.293455
C6orf136	-0.29335
TRIM29	-0.293266
SDF2L1	-0.293262
GSDMD	-0.292968
GREM1	-0.292945
C11orf16	-0.2929
DHX15	-0.292846
SEC11C	-0.292689
RAD54L2	-0.292621
PTCH1	-0.29262
NTN1	-0.292602
CHCHD1	-0.292529
ECHDC3	-0.29244
UBE2D3	-0.292417
LOC151534	-0.292335
ADAM6	-0.292243
C10orf58	-0.292119
IL10	-0.292105
GIMAP4	-0.292013
CHD4	-0.291961
COQ3	-0.291801
NR4A2	-0.291778
TRAPPC5	-0.291757
LRRC33	-0.291736
THRSP	-0.291704
CRYGC	-0.291517
ABCA13	-0.291502
TCOF1	-0.291496
GSR	-0.291072
IL15	-0.291044
NYNRIN	-0.29098
SLC5A1	-0.290962
RABEP2	-0.290836
ADAMTSL4	-0.290774
CDC16	-0.290728
IRF2	-0.290706
PAFAH1B3	-0.290701
IRGM	-0.290693
CD38	-0.290423
LOC90834	-0.29024
RPL13A	-0.290216
LMNA	-0.290206
C1orf174	-0.29019
TIGD2	-0.290169
PFKFB2	-0.289989
PEX19	-0.289952
AADAC	-0.289717
NDUFB2	-0.28969
YRDC	-0.289611
BCL2L14	-0.289588
NPTX2	-0.289557
RAB36	-0.289493
FAT1	-0.289436
RNF115	-0.289409
ERP27	-0.289312
AMDHD2	-0.289237
KCNMB4	-0.289081
YKT6	-0.289008
ELTD1	-0.289005
NUDT15	-0.288957
ZNHIT1	-0.288855
SRGAP2	-0.288785
RBBP5	-0.288776
SI	-0.288752
GPR3	-0.288373
DISP1	-0.288231
IP6K3	-0.288073
MT4	-0.288049
CLDN12	-0.287897
TMEM125	-0.287846
FBXW5	-0.287796
LOC100292680	-0.287607
CEBPE	-0.287506
CD9	-0.287478
PEX5L	-0.287411
LYAR	-0.287328
CITED4	-0.287309
MPHOSPH6	-0.287225
DPP10	-0.286968
PTPRR	-0.286967
MAP1S	-0.286919
TLR3	-0.286904
LOC100294362	-0.28675
MRPL39	-0.28654
KIF5C	-0.286512
WDR63	-0.28651
ATPAF1	-0.28606
ENC1	-0.286011
SPN	-0.285827
FAM113B	-0.28561
LOC440356	-0.285585
FAM176B	-0.28547
CNDP1	-0.285346
PPP5C	-0.285212
WIPI2	-0.285204
DDX1	-0.285156
PYDC1	-0.285028
CALCB	-0.284953
CCND2	-0.284842
FBXO38	-0.28481
TUBGCP2	-0.28466
MGST2	-0.284609
MARS2	-0.284406
PVRL4	-0.284381
FANCG	-0.284348
GLTPD1	-0.284227
PPFIA3	-0.28422
SLC4A1AP	-0.284158
QSER1	-0.28415
TRAP1	-0.284086
FAM136A	-0.284066
SLC15A1	-0.283583
SCAP	-0.283527
NUP93	-0.283326
[truncated: 14,219 more rows]

## Sheet: Protein Correl.
Sample_Name	Correl
SMAD1	-0.769505
CYCLINE1	-0.725955
P90RSK	-0.66971
CHK2	-0.544889
SHC_pY317	-0.524223
MSH2	-0.489675
EIF4E	-0.484975
JNK2	-0.462641
GAPDH	-0.436427
EGFR_pY1068	-0.43019
ANNEXINVII	-0.422776
BRCA2	-0.415717
CASPASE8	-0.405473
PARPCLEAVED	-0.405156
PKCPANBETAII_pS660	-0.379281
1433EPSILON	-0.373298
AKT_pT308	-0.367148
STAT3_pY705	-0.351692
HER2_pY1248	-0.350355
FASN	-0.347379
BIM	-0.343155
BRAF_pS445	-0.341267
ANNEXIN1	-0.340602
COX2	-0.334234
CHK1_pS345	-0.333739
GCN5L2	-0.325691
ADAR1	-0.325323
CASPASE7CLEAVEDD198	-0.320143
AKT_pS473	-0.31957
STATHMIN	-0.314183
JNK_pT183PY185	-0.312847
SETD2	-0.308408
ERCC1	-0.307123
ARAF	-0.298188
GSK3ALPHABETA	-0.294207
BID	-0.293159
SNAIL	-0.28827
LCK	-0.279526
BECLIN	-0.272691
MTOR_pS2448	-0.268846
CD31	-0.259355
CHK2_pT68	-0.249714
HER3_pY1289	-0.2481
EGFR_pY1173	-0.247826
FOXO3A	-0.241695
NFKBP65_pS536	-0.238432
PRAS40_pT246	-0.235081
RAPTOR	-0.231788
P53	-0.231067
PDK1_pS241	-0.222016
RAB25	-0.217618
P16INK4A	-0.216826
1433BETA	-0.216554
CKIT	-0.212815
DJ1	-0.204644
HER2	-0.192913
JAB1	-0.192417
CLAUDIN7	-0.191414
53BP1	-0.182297
PARP1	-0.181285
RAB11	-0.177688
EGFR	-0.17113
PDK1	-0.169588
NRAS	-0.169466
P38_pT180Y182	-0.16447
SRC_pY416	-0.158468
STAT5ALPHA	-0.154491
MSH6	-0.145187
MIG6	-0.128178
P27_pT157	-0.117817
SF2	-0.115957
G6PD	-0.110276
PDCD4	-0.108972
MTOR	-0.101002
SYK	-0.0951462
CD49B	-0.0888806
BAK	-0.088557
MEK1	-0.0805228
RAD50	-0.0773626
PCNA	-0.0748997
TIGAR	-0.0696147
ACVRL1	-0.0648987
PEA15	-0.058014
S6_pS235S236	-0.0495898
MEK1_pS217S221	-0.0285475
FOXM1	-0.0283454
NDRG1_pT346	-0.0243411
IGFBP2	-0.0214212
ETS1	-0.0181098
TRANSGLUTAMINASE	-0.0113355
BRAF	-0.0104939
CHK1	-0.00983021
FOXO3A_pS318S321	-0.00360463
ACC_pS79	-0.00293516
PREX1	0.0116878
TAZ	0.0123597
SRC_pY527	0.0300163
TFRC	0.0338984
S6_pS240S244	0.0353629
HER3	0.0451618
RAD51	0.0489163
GSK3_pS9	0.0499537
BCL2	0.0579502
RICTOR_pT1135	0.0625913
VEGFR2	0.0672928
4EBP1_pS65	0.0784398
CMET_pY1235	0.0875951
ECADHERIN	0.0895647
DIRAS3	0.0952953
4EBP1	0.107607
CAVEOLIN1	0.11756
EEF2K	0.124521
AR	0.12493
FAK	0.12561
AKT	0.132519
TUBERIN_pT1462	0.134626
NF2	0.136782
PAI1	0.141794
SMAD4	0.144017
NOTCH1	0.153541
COLLAGENVI	0.158892
P27	0.162464
BAX	0.169888
P70S6K_pT389	0.170267
RICTOR	0.1766
GSK3ALPHABETA_pS21S9	0.176967
GAB2	0.17703
4EBP1_pT37T46	0.186743
YB1_pS102	0.188784
BCLXL	0.196878
ACC1	0.203152
MYOSINIIA_pS1943	0.20657
HEREGULIN	0.206929
XRCC1	0.20735
PKCDELTA_pS664	0.213787
CMET	0.228112
YAP_pS127	0.239379
EEF2	0.250827
PKCALPHA	0.259004
SMAC	0.259277
CJUN_pS73	0.272745
SMAD3	0.277454
PR	0.279554
CYCLIND1	0.281058
IRS1	0.281416
PEA15_pS116	0.285342
PKCALPHA_pS657	0.286273
CIAP	0.2894
INPP4B	0.290528
SRC	0.29107
SCD	0.312672
AMPKALPHA	0.319105
BAD_pS112	0.320176
FIBRONECTIN	0.322622
ERALPHA	0.32354
1433ZETA	0.324625
ATM	0.335097
GATA3	0.342206
NCADHERIN	0.348674
ERALPHA_pS118	0.350452
RBM15	0.35142
TUBERIN	0.36386
EIF4G	0.377984
MAPK_pT202Y204	0.393672
CYCLINB1	0.395278
CMYC	0.396768
YAP	0.397163
PAXILLIN	0.417671
DVL3	0.437487
AMPK_pT172	0.437948
BETACATENIN	0.439551
PI3KP85	0.443517
YB1	0.443936
PI3KP110ALPHA	0.45794
TSC1	0.464064
P70S6K	0.472097
PTEN	0.473954
CDK1	0.49614
IGFRB	0.500884
P21	0.501734
RB	0.504267
CRAF_pS338	0.508277
CRAF	0.587459
P27_pT198	0.602289
RB_pS807S811	0.604806
