# Supplementary material for: Synthetic lethality between CCNE1 hyperactivity and PARG inhibition in breast cancer
Source: Research Square preprint supplement (doi:10.21203/rs.3.rs-2231840/v1), 2022-11-21
Supplement: Supplementary file 2 [file dbabd9bfea218e4bcb94e665.xlsx]

## Sheet: All-Ranked
siXRCC1 was used as a positive control and genes listed in red are known DNA repair factors.
Gene Name	DMSO-1	DMSO-2	DMSO-3	DMSO-4	PDD-1	PDD-2	PDD-3	PDD-4	P/D-1	P/D-2	P/D-3	P/D-4	average P/D	sd P/D
DUT	8769	8573	8546	8473	1501	1228	1398	1340	0.171171	0.14324	0.163585	0.158149	0.159037	0.0118074
LIG1	10552	10511	10232	10432	2221	2292	2229	2645	0.210481	0.218057	0.217846	0.253547	0.224983	0.0193657
siXRCC1	9251	9281	9330	8979	2775	2323	2469	2203	0.299968	0.250296	0.26463	0.24535	0.265061	0.0246655
siXRCC1	9647	9225	9223	8761	2900	2645	2444	2288	0.300612	0.286721	0.26499	0.261157	0.27837	0.0186166
siXRCC1	9181	9288	8971	8424	2574	2700	2617	2536	0.280362	0.290698	0.291718	0.301045	0.290955	0.00845909
siXRCC1	9604	9615	9664	9284	3268	2738	2637	2652	0.340275	0.284763	0.272868	0.285653	0.29589	0.0301586
LIG3	6659	6174	6036	5851	2183	2368	2853	2393	0.327827	0.383544	0.472664	0.40899	0.398256	0.060079
siXRCC1	9598	9407	9647	9705	3647	4006	4184	3978	0.379975	0.425853	0.43371	0.409892	0.412357	0.0237541
NUP160	7814	7214	7966	5327	3136	3136	2803	3265	0.401331	0.43471	0.35187	0.612915	0.450207	0.113685
siXRCC1	9595	9325	9768	9700	4424	4883	4348	4178	0.461073	0.523646	0.445127	0.430722	0.465142	0.0409253
siXRCC1	9710	9894	9679	9759	4150	4789	4937	5295	0.427394	0.484031	0.510073	0.542576	0.491019	0.0487104
PCNA	9302	9514	9681	9603	5729	3597	5227	4231	0.615889	0.378074	0.539924	0.440591	0.49362	0.105288
SHFM1	7849	7437	7610	7857	4049	4409	4526	4828	0.515862	0.592847	0.594744	0.614484	0.579484	0.0435285
CDC40	4204	6024	4142	4420	2781	2100	2495	3249	0.661513	0.348606	0.602366	0.735068	0.586888	0.167873
ARHGAP11B	7915	8309	6906	7088	4232	4439	4004	4977	0.534681	0.53424	0.579786	0.702173	0.58772	0.0792372
TSHZ1	9248	9006	8332	8883	5897	5743	5616	6004	0.637651	0.637686	0.674028	0.675898	0.656316	0.0215453
CHEK1	4465	3801	5154	3768	2864	1803	1762	4786	0.641433	0.474349	0.34187	1.27017	0.681956	0.410851
SNAP23	7803	7978	6261	6760	5203	5132	3999	5456	0.666795	0.643269	0.638716	0.807101	0.68897	0.0797091
SMN1	1992	1883	1553	1441	1130	1120	1246	1156	0.567269	0.594796	0.802318	0.802221	0.691651	0.128225
POLD1	9028	8466	8065	7905	6174	6377	5024	5663	0.683872	0.753248	0.622939	0.716382	0.69411	0.0552677
TXNL4A	8708	8682	8561	8013	5937	6214	5504	5927	0.681787	0.715734	0.642916	0.739673	0.695027	0.042083
PTS	8622	8922	8060	9172	5560	5426	6226	7080	0.644862	0.60816	0.772457	0.771915	0.699348	0.0854299
EFCBP2	9271	9375	8262	9200	5920	5896	6583	7070	0.63855	0.628907	0.79678	0.768478	0.708179	0.0868302
TDP1	8021	7587	6950	7075	5351	5171	4752	5794	0.667124	0.681561	0.683741	0.81894	0.712841	0.0711157
GRAMD3	8914	8519	9095	8716	5802	6415	6483	6468	0.650886	0.753023	0.712809	0.742084	0.7147	0.0458049
GABRG3	7682	7498	7617	7665	5798	5431	5537	5058	0.754751	0.724326	0.726927	0.659883	0.716472	0.0401608
HIATL1	8349	8150	8226	8049	5751	6103	6007	5703	0.688825	0.748834	0.730246	0.708535	0.71911	0.0260547
THBS4	8751	8773	8111	8427	6629	6508	5688	5697	0.757513	0.741821	0.70127	0.676041	0.719162	0.037255
GFM2	9397	9494	9484	9138	6726	6761	6587	6936	0.71576	0.712134	0.694538	0.759028	0.720365	0.0273911
NAIP	9787	9193	9738	9281	6571	7018	6857	6954	0.671401	0.763407	0.704149	0.749273	0.722057	0.0421792
IFT74	9151	9223	7673	8277	6041	6653	5722	6301	0.660146	0.721349	0.745732	0.761266	0.722123	0.0444644
GALC	8758	8942	7844	8580	6406	6362	6438	5498	0.731446	0.711474	0.820755	0.640793	0.726117	0.0741156
GTF2H2B	9114	9133	8311	8716	6401	6745	6021	6476	0.702326	0.738531	0.724462	0.743001	0.72708	0.0182959
TSLP	8679	8806	8377	9466	5910	6758	6374	6619	0.680954	0.767431	0.760893	0.699239	0.727129	0.0434904
ARGLU1	9194	9266	8495	8674	6252	6958	6033	6795	0.680009	0.750917	0.710182	0.783376	0.731121	0.0453627
XRCC5	8948	8750	8628	7624	5976	6021	6081	6622	0.667859	0.688114	0.704798	0.868573	0.732336	0.0920719
ZNF738	9064	9169	8403	8795	6555	6957	5734	6780	0.723191	0.758752	0.682375	0.770893	0.733803	0.0398143
NIPA2	9321	8948	8842	8950	6154	6675	6365	7271	0.66023	0.745977	0.71986	0.812402	0.734617	0.0630631
BTF3	8090	9262	7483	7844	6431	6066	5101	6488	0.794932	0.654934	0.681678	0.827129	0.739668	0.0841549
NOTCH2	9338	9772	9160	8869	6566	7128	7051	6713	0.703148	0.729431	0.76976	0.756906	0.739811	0.0296708
MCPH1	8738	8219	7336	7437	6436	6231	4959	5868	0.736553	0.758121	0.675981	0.789028	0.739921	0.0477575
MAST4	8445	7776	7928	6124	5450	5000	6026	5590	0.645352	0.643004	0.760091	0.912802	0.740312	0.127319
RAD51	1571	1600	1713	1523	1126	1046	1283	1286	0.716741	0.65375	0.748978	0.844386	0.740964	0.0794846
ALDH7A1	7360	8953	8488	8445	6562	5644	5840	6420	0.891576	0.630403	0.68803	0.760213	0.742556	0.11265
CMYA5	9084	8726	8821	7682	6729	6147	6161	6382	0.740753	0.704446	0.698447	0.830773	0.743605	0.0610439
NDFIP2	8817	9122	8245	8650	6958	6657	5819	6507	0.789157	0.729774	0.705761	0.752254	0.744237	0.0354574
RAD50	8872	9055	9196	9122	6421	7034	6702	6869	0.723738	0.776808	0.728795	0.753015	0.745589	0.024422
SLC30A5	9501	9077	8679	8600	7087	7205	5922	6594	0.745921	0.793764	0.682337	0.766744	0.747192	0.0474662
WDR36	6242	6793	5923	5679	4700	4230	4220	5121	0.752964	0.6227	0.712477	0.901743	0.747471	0.116365
CCNB1	8922	9021	8876	8629	6374	7201	5971	7012	0.714414	0.798249	0.672713	0.812609	0.749496	0.0670483
BTG3	8907	8990	8123	8582	6600	6670	5769	6908	0.74099	0.741935	0.710206	0.804941	0.749518	0.03978
UTP15	2082	2148	2148	1992	1731	1522	1527	1496	0.831412	0.708566	0.710894	0.751004	0.750469	0.0573705
CHAF1A	6654	6759	7159	6574	4339	4307	5576	6156	0.652089	0.637224	0.77888	0.936416	0.751152	0.138906
RPS23	4516	9345	5224	7244	3780	3917	4743	6090	0.837024	0.419155	0.907925	0.840696	0.7512	0.22375
POLE	6502	6116	4656	4026	3530	3388	3334	4818	0.54291	0.553957	0.716065	1.19672	0.752413	0.306598
RAPGEF4	9395	9536	9473	9492	6820	6844	7255	7708	0.725918	0.717701	0.765861	0.812052	0.755383	0.0432407
ATMIN	9597	9709	9786	9779	8521	7445	6657	6736	0.887882	0.766814	0.680258	0.688823	0.755944	0.0961932
ZNF738	9692	9227	9175	8851	8217	7608	6487	5903	0.847813	0.824537	0.70703	0.66693	0.761577	0.0881928
DENND5A	9677	9881	9658	9667	7187	7382	7829	7365	0.742689	0.74709	0.810623	0.76187	0.765568	0.031137
BUD13	3897	3466	2971	3161	2656	2280	2377	2922	0.68155	0.657819	0.800067	0.924391	0.765957	0.122588
POLB	9452	9418	9370	9468	7109	8134	6885	6797	0.752116	0.863665	0.734792	0.717892	0.767116	0.0658651
C20orf133	9274	8990	8883	8867	7004	7176	6727	6772	0.75523	0.79822	0.757289	0.763731	0.768617	0.0200646
RHD	9474	8903	8015	7892	5910	7213	6584	6571	0.623813	0.810176	0.82146	0.832615	0.772016	0.0992261
COG6	9788	10099	9674	9904	7958	7508	7532	7514	0.813036	0.74344	0.778582	0.758683	0.773435	0.030067
GTF2H2	9062	9159	8207	8519	6560	7082	7077	6266	0.723902	0.773229	0.862313	0.735532	0.773744	0.0626871
RTF1	3200	5859	3378	2383	2786	2536	2774	2330	0.870625	0.432838	0.821196	0.977759	0.775605	0.237671
CCDC84	8823	8843	8524	8454	7238	6505	6775	6424	0.820356	0.73561	0.794815	0.759877	0.777664	0.0374239
PMP22	9727	8991	9006	9470	7352	7004	8015	6572	0.755834	0.779001	0.889962	0.693981	0.779695	0.0818038
FANCA	8493	9162	8839	8764	5876	6765	7675	7193	0.691864	0.738376	0.868311	0.820744	0.779824	0.079497
C13orf8	9605	9572	9385	8977	7468	7376	7800	6662	0.777512	0.770581	0.831113	0.742119	0.780331	0.0371575
XPA	9359	9689	9464	9236	7647	7280	7105	7416	0.817074	0.751368	0.75074	0.802945	0.780532	0.0345246
ENC1	9397	9496	8974	9297	7373	7351	7091	7268	0.784612	0.774115	0.790172	0.781758	0.782664	0.00668479
PDE8B	7433	7474	7290	7648	5999	5690	5776	5891	0.807077	0.761306	0.792318	0.770267	0.782742	0.0208088
PJA2	6787	4928	6349	6031	4540	3861	5448	4963	0.668926	0.783482	0.858088	0.822915	0.783353	0.0821463
GPR98	9150	9143	8773	9777	6613	7039	7300	7937	0.722732	0.769879	0.832098	0.811803	0.784128	0.0484409
KIAA1797	9151	9128	8751	8689	6544	7337	6989	7136	0.715113	0.803791	0.798652	0.821268	0.784706	0.0473943
CCDC25	9684	9397	9141	9058	7318	6907	7305	7712	0.755679	0.735022	0.799147	0.851402	0.785313	0.0515315
KIF11	859	1088	1214	934	712	816	844	811	0.828871	0.75	0.695222	0.868308	0.7856	0.0777785
FDXACB1	8621	9193	8180	8519	6356	6692	7130	6898	0.737269	0.727945	0.871638	0.809719	0.786643	0.0674287
TNPO1	9460	9705	9755	10026	7617	7739	7155	8145	0.80518	0.797424	0.73347	0.812388	0.787115	0.0362818
TRIM16	9228	9319	9047	9199	6889	7313	6836	7929	0.746532	0.784741	0.75561	0.861942	0.787206	0.0524219
FBXL17	9047	9329	9047	9048	7323	7017	6926	7513	0.80944	0.752171	0.765558	0.830349	0.789379	0.0366647
TMEM161B	9434	9228	9297	9201	7320	7060	8327	6702	0.775917	0.765063	0.895665	0.728399	0.791261	0.0725113
TPT1	1516	1715	1517	1317	1042	1150	1143	1401	0.687335	0.670554	0.753461	1.06378	0.793783	0.183523
CSNK2A1	7899	7606	7216	7082	5508	6334	5520	6241	0.697303	0.832764	0.764967	0.881248	0.794071	0.0802247
no esiRNA	9095	9830	8590	9342	6745	8383	6996	7181	0.741616	0.852798	0.814435	0.768679	0.794382	0.0491914
AC026495.1	9570	9511	9073	9383	6989	7569	7903	7332	0.730303	0.795815	0.871046	0.781413	0.794644	0.0581763
FANCG	8537	8536	8465	8395	5935	7262	7042	6745	0.695209	0.85075	0.831896	0.803454	0.795327	0.0695189
DMRTA1	9740	9572	9590	9171	8101	7661	7844	6774	0.831725	0.800355	0.817935	0.738633	0.797162	0.0410772
RBBP8	9280	9265	9024	9177	6999	7744	6499	8076	0.754203	0.835834	0.720191	0.880026	0.797563	0.073329
PTEN	9197	8794	9240	8194	6685	8008	6361	7198	0.726867	0.910621	0.68842	0.878448	0.801089	0.109825
HSD17B4	9248	8629	8970	8111	7222	6378	7001	7340	0.780926	0.739135	0.780491	0.904944	0.801374	0.0717742
MIER3	9936	9757	9799	9799	8143	7849	8190	7339	0.819545	0.804448	0.8358	0.748954	0.802187	0.037727
MTUS1	8882	9110	8947	9350	7162	7025	6880	8063	0.80635	0.771131	0.768973	0.862353	0.802202	0.0436079
KCNRG	7886	8149	7340	8281	6468	6599	5871	6503	0.820188	0.809793	0.799864	0.785292	0.803784	0.0148607
AGGF1	9108	8733	8788	8566	6940	6464	7517	7380	0.761968	0.740181	0.855371	0.861546	0.804766	0.0626837
GLG1	9442	9342	9333	9572	6991	7628	7866	7846	0.740415	0.816528	0.842816	0.819682	0.80486	0.0445332
NHEJ1	9023	8998	9213	8952	7085	7135	7246	7691	0.785216	0.792954	0.786497	0.859138	0.805951	0.035619
DDX47	8644	8253	7858	7664	6233	6529	6434	6877	0.721078	0.791106	0.818783	0.897312	0.80707	0.0728704
YTHDC2	9269	9478	9371	9192	7695	7941	7297	7203	0.830187	0.837835	0.778679	0.783616	0.807579	0.0307461
NEIL1	9091	8980	8831	9085	7105	6939	7506	7583	0.781542	0.772717	0.84996	0.834673	0.809723	0.0383193
SSBP2	7018	7623	6344	6760	5813	5672	5859	5072	0.828299	0.744064	0.92355	0.750296	0.811552	0.0839264
GTF2E2	8305	8121	7363	6530	6185	6471	5679	6112	0.744732	0.796823	0.771289	0.935988	0.812208	0.0852164
GTF2H3	9547	9558	9122	8947	7714	7828	6816	7829	0.808003	0.819	0.747205	0.875042	0.812312	0.0524001
TMEM66	9233	9277	9251	9186	6612	8146	7795	7488	0.716127	0.878086	0.842612	0.815153	0.812994	0.069527
ZFYVE16	9460	9421	9191	8939	7452	8148	6954	7558	0.787738	0.864876	0.75661	0.845508	0.813683	0.0502133
ATP6V1B2	8898	8320	8641	5882	6664	7084	6105	5595	0.748932	0.851442	0.706515	0.951207	0.814524	0.109565
ERCC2	9353	9650	9096	9361	7911	8213	7006	7410	0.845825	0.851088	0.770229	0.791582	0.814681	0.0400208
XPC	9062	8820	8963	9319	8457	7709	6630	6651	0.933238	0.874036	0.739708	0.713703	0.815171	0.105507
EFHA1	9535	9514	9662	9522	7354	7283	7846	8696	0.771264	0.765503	0.812047	0.913254	0.815517	0.0683719
JMY	9373	9351	9438	9163	8174	6618	8371	7337	0.872079	0.707732	0.886946	0.80072	0.816869	0.0819161
PTCD2	9713	9767	9651	9711	7883	8211	7756	7890	0.811593	0.840688	0.803647	0.812481	0.817102	0.0162177
PLA2G4D	9040	9205	9092	8542	7327	7826	6894	7309	0.810509	0.85019	0.758249	0.855654	0.818651	0.0450136
ASXL2	8837	9249	9060	8024	7379	7054	6801	7447	0.835012	0.762677	0.750662	0.928091	0.81911	0.0816485
CDC16	9624	9012	9205	8693	7432	8167	6589	7685	0.772236	0.906236	0.715807	0.884045	0.819581	0.0906924
HSPA8	9539	9425	9493	9226	7365	6970	7694	8853	0.772094	0.739523	0.810492	0.959571	0.82042	0.0971963
SAMSN1	8824	7796	8042	7767	6884	6644	6163	6870	0.780145	0.852232	0.766352	0.884511	0.82081	0.0567584
WRN	9112	8942	8000	8471	6732	7303	6750	7492	0.738806	0.816708	0.84375	0.884429	0.820923	0.0614141
UBE2N	9123	9328	8720	8947	6917	7447	7658	7657	0.758194	0.798349	0.878211	0.855818	0.822643	0.0545658
MLH3	9429	9455	8833	9143	7236	8472	7183	7494	0.76742	0.896034	0.8132	0.819643	0.824074	0.0533098
ZBED1	8845	8935	8866	9126	7366	6710	7759	7685	0.832787	0.750979	0.875141	0.842099	0.825252	0.0527445
MNAT1	8732	8897	8076	7419	6897	7857	6739	5912	0.789853	0.883107	0.834448	0.796873	0.82607	0.0427687
OCLN	9326	8762	9216	9248	8194	7406	7670	6950	0.878619	0.845241	0.832248	0.751514	0.826905	0.0539225
FNTA	9054	8804	8406	9402	7319	7404	7419	7293	0.808372	0.840981	0.882584	0.775686	0.826906	0.0456988
ANKRD11	9204	9185	8984	8882	7019	7588	7555	7804	0.762603	0.82613	0.840939	0.878631	0.827076	0.0483313
no esiRNA	8608	8659	7961	8006	7719	7702	5757	6405	0.896724	0.889479	0.72315	0.800025	0.827345	0.0822131
no esiRNA	9528	9609	8809	9604	7092	8905	7466	7682	0.744332	0.926735	0.847542	0.799875	0.829621	0.0772686
MGMT	8392	8114	8050	7680	6685	7184	6840	6052	0.796592	0.885383	0.849689	0.788021	0.829921	0.0459467
DCUN1D5	9552	9634	9506	9503	8362	7802	7819	7805	0.875419	0.80984	0.822533	0.82132	0.832278	0.0293237
KCNRG	7146	6833	8589	6751	5775	5843	6448	6200	0.808144	0.855115	0.750728	0.918382	0.833092	0.0711002
TMEM171	9381	9801	9192	9571	8160	8109	7937	7427	0.869843	0.827365	0.863468	0.77599	0.834167	0.0430589
DARS	9619	9357	9062	8605	8469	7390	6623	8061	0.880445	0.789783	0.730854	0.936781	0.834466	0.0918593
HOMER1	9266	9549	9594	9383	7744	7830	8065	7901	0.835744	0.819981	0.84063	0.842055	0.834602	0.0101151
GOLGA8A	8265	7393	7624	6464	6274	5856	5722	6732	0.759105	0.792101	0.750525	1.04146	0.835798	0.138275
FANCE	9224	9180	8837	8924	7840	7670	8221	6502	0.849957	0.835512	0.930293	0.728597	0.83609	0.0829087
DENND4C	9049	9388	8604	8846	6598	7251	7859	8225	0.729141	0.772369	0.913412	0.929799	0.83618	0.10043
no esiRNA	9729	9732	9428	9385	8144	7829	8098	7936	0.837085	0.80446	0.858931	0.845605	0.83652	0.0231874
DLAT	9709	9519	9678	9537	7749	8372	7864	8170	0.798125	0.879504	0.812565	0.856664	0.836714	0.0378649
ELP3	9176	8738	8991	8965	7826	8161	7168	6869	0.852877	0.933967	0.797242	0.766202	0.837572	0.0735898
PAFAH1B2	9977	9998	9730	9739	8004	7944	8169	8921	0.802245	0.794559	0.839568	0.916008	0.838095	0.0555373
ZNF407	9607	9627	9146	9701	7604	7890	7628	8822	0.791506	0.81957	0.834026	0.909391	0.838623	0.0503727
C19orf40	8206	8485	7751	8090	7695	7200	6161	6323	0.937728	0.848556	0.794865	0.781582	0.840683	0.0708802
FAM120B	9471	9639	9755	9554	7743	8638	7933	8017	0.817548	0.896151	0.813224	0.839125	0.841512	0.0381471
ANKRA2	9520	9786	9482	9523	7975	8112	7920	8251	0.83771	0.828939	0.835267	0.866429	0.842086	0.0166438
USP1	9630	9638	9446	9340	7621	7837	8291	8308	0.791381	0.813136	0.877726	0.889507	0.842938	0.0480459
ZNF259	8687	8495	8527	8134	7355	6703	7303	7159	0.846667	0.789052	0.856456	0.880133	0.843077	0.0386595
FHIT	8792	8265	8347	8447	7067	6911	7437	7107	0.803799	0.836177	0.890979	0.841364	0.84308	0.0359995
MRE11A	9441	9739	9245	9554	8428	8288	7506	7806	0.892702	0.851011	0.811898	0.81704	0.843163	0.0373078
SNX24	9700	9451	9818	10027	8195	8521	8014	8167	0.844845	0.901598	0.816256	0.814501	0.8443	0.0406521
RDM1	9474	9324	9169	9341	8062	8318	7951	7174	0.850961	0.892106	0.867161	0.768012	0.84456	0.053765
MTMR10	9394	9430	9138	9448	7821	7931	8189	7663	0.832553	0.841039	0.896148	0.811071	0.845203	0.0362295
GTF2H2B	9376	9550	9386	9706	7919	7917	7991	8352	0.844603	0.829005	0.851374	0.860499	0.84637	0.0132831
ZNF486	9573	9824	9559	9273	8552	8262	7459	8091	0.893346	0.841002	0.780312	0.872533	0.846798	0.0492714
NCOR1	9409	8826	8463	8970	7843	7688	7448	7235	0.833564	0.871063	0.880066	0.806577	0.847818	0.0340795
MRPS27	8411	8285	8610	8970	6915	7427	7185	7532	0.822138	0.896439	0.834495	0.839688	0.84819	0.0329978
BACE1	9431	9292	9357	9195	7101	8746	8090	7678	0.752942	0.94124	0.864593	0.835019	0.848449	0.0778302
SDHD	9519	9697	9377	9556	7742	7929	8250	8455	0.813321	0.817676	0.879812	0.884784	0.848898	0.0386614
HELQ	9136	9104	9707	9213	7733	7979	7953	7872	0.846432	0.876428	0.819306	0.854445	0.849153	0.0235952
RPA1	1354	1436	1159	1147	1070	960	988	1248	0.790251	0.668524	0.852459	1.08806	0.849822	0.176239
GTF2H2B	9383	9149	9277	9630	8429	7198	8453	7745	0.898327	0.786753	0.911178	0.804258	0.850129	0.063694
PDE4B	8554	8743	8803	8756	7219	7524	6906	7983	0.843933	0.860574	0.784505	0.911718	0.850182	0.0524313
MTAP	9737	9205	9262	8952	7796	7436	8313	8027	0.800657	0.807822	0.897538	0.896671	0.850672	0.0536966
DHFRL1	9333	9131	8596	8659	7679	7567	8042	7111	0.822779	0.828715	0.935551	0.821226	0.852068	0.055749
SV2C	9394	9207	9328	9380	8229	7829	7978	7774	0.875985	0.850331	0.855274	0.828785	0.852594	0.0193762
E2F4	8919	9173	8830	8331	7641	7613	7512	7279	0.85671	0.829936	0.850736	0.873725	0.852777	0.0180755
XRCC4	9175	9657	9097	9090	8221	8670	7191	7519	0.896022	0.897794	0.79048	0.827173	0.852867	0.0530191
FNBP1L	8839	8902	8828	8671	7940	7215	7491	7407	0.898292	0.810492	0.84855	0.854227	0.85289	0.0359607
EXTL3	9522	9775	9614	9756	7826	8143	8120	8906	0.821886	0.833043	0.844602	0.912874	0.853101	0.0409135
PNMA2	7995	8281	8482	7453	7806	6733	6851	6088	0.97636	0.813066	0.80771	0.816852	0.853497	0.0819945
KBTBD11	9527	9404	9219	9331	7927	8126	7950	7992	0.832056	0.8641	0.862349	0.8565	0.853751	0.0148241
AC011494.2-2	9074	9238	9154	8839	7541	8098	7683	7677	0.831056	0.876597	0.839305	0.868537	0.853874	0.0220926
CXADR	9826	9697	9888	9614	7883	8014	8376	9042	0.802259	0.826441	0.847087	0.940503	0.854073	0.0604626
FDFT1	7629	7368	7788	7619	6711	6321	6679	6275	0.87967	0.857899	0.857601	0.823599	0.854692	0.0231619
XRCC6	9907	10005	9695	9724	8144	8274	8701	8500	0.822045	0.826987	0.897473	0.874126	0.855158	0.0366989
MSH3	9286	9678	8744	8944	7395	8156	7988	7801	0.79636	0.842736	0.913541	0.872205	0.85621	0.0493498
BIN3	9581	9702	9724	9240	8438	8009	7812	8459	0.880701	0.8255	0.803373	0.915476	0.856263	0.0511441
NF1	8974	8476	8135	8103	7604	6973	7428	6824	0.847337	0.822676	0.913092	0.842157	0.856315	0.0393117
FEN1	9635	9475	9243	8558	8548	8167	7387	7513	0.887182	0.861953	0.799199	0.877892	0.856557	0.039632
EXO1	8910	9065	9211	8978	7246	7720	7991	8029	0.813244	0.851627	0.86755	0.894297	0.856679	0.0338893
GPBP1	9649	9537	9623	9811	8626	8087	8184	8264	0.893979	0.847961	0.850462	0.84232	0.85868	0.0237773
CHD1	10174	10170	10183	10050	8391	8688	8962	8839	0.824749	0.854277	0.880094	0.879502	0.859656	0.026198
POLN	9013	8603	7403	7693	7526	7423	6258	6900	0.835016	0.862839	0.845333	0.896919	0.860027	0.0271441
no esiRNA	9320	8783	9388	8581	7431	7460	8072	8013	0.797318	0.849368	0.859821	0.933807	0.860078	0.0562424
C15orf24	9577	9731	9865	9588	8475	8135	8351	8375	0.884933	0.835988	0.846528	0.873488	0.860234	0.0228137
HEXB	9643	9651	9400	9468	8535	8290	7855	8195	0.885098	0.858978	0.835638	0.865547	0.861315	0.0203985
CETN3	9498	9539	8923	8814	7959	7563	8111	7985	0.837966	0.79285	0.908999	0.905945	0.86144	0.0562677
TDG	9248	9272	9372	9542	8279	8192	7874	7891	0.895221	0.88352	0.840162	0.826975	0.86147	0.0330112
ZNF43	9440	9646	9314	9545	8168	8275	8429	7808	0.865254	0.857869	0.904982	0.81802	0.861531	0.0356299
C8orf40	9581	9183	8793	8893	8675	7994	6762	8024	0.905438	0.870522	0.769021	0.902283	0.861816	0.0638413
DPAGT1	8948	7862	6542	5936	5677	6972	5661	6302	0.634443	0.886797	0.865332	1.06166	0.862058	0.175377
PIBF1	9317	9290	9373	9499	7649	7747	8319	8620	0.820972	0.833907	0.887549	0.907464	0.862473	0.0415985
BRCA2	9415	9596	9603	9584	8136	8505	7897	8439	0.864153	0.886307	0.822347	0.88053	0.863334	0.0288908
REXO2	9185	9142	8528	8425	8560	8067	7044	6870	0.931954	0.882411	0.825985	0.81543	0.863945	0.0540398
FCHO2	8867	9092	9051	8817	8229	7461	7510	7741	0.928048	0.820612	0.829743	0.877963	0.864091	0.0495082
HACE1	9435	8846	9361	9345	7936	8025	7815	8165	0.841123	0.90719	0.834847	0.873729	0.864222	0.033332
DMBT1	9167	9018	8636	8112	7727	8121	7185	7171	0.842915	0.900532	0.831982	0.883999	0.864857	0.0326667
APTX	9556	9497	10159	9909	8248	8133	8579	8907	0.863123	0.856376	0.844473	0.89888	0.865713	0.0234171
PARK2	8843	9144	8815	8928	7718	7959	7612	7649	0.872781	0.870407	0.863528	0.856743	0.865865	0.00723719
FUT9	9484	9533	9691	9581	8780	7902	8025	8479	0.92577	0.82891	0.828088	0.884981	0.866937	0.0474066
KANK1	9509	9216	9091	9063	7666	8570	7832	7900	0.806184	0.929905	0.861511	0.871676	0.867319	0.0506859
MPG	9710	9596	9250	9465	8976	8125	8280	7606	0.924408	0.846707	0.895135	0.803592	0.867461	0.0532878
BTBD7	9077	9547	8992	9289	8075	8446	7619	7885	0.889611	0.884676	0.847309	0.848853	0.867612	0.0226513
ATL3	9503	9765	9684	9817	8098	8206	8808	8526	0.852152	0.840348	0.909542	0.868493	0.867634	0.030228
PPP3CC	9717	9730	9652	9860	8295	8572	8354	8586	0.853659	0.880987	0.86552	0.870791	0.867739	0.0113725
FAM118B	9181	9515	9117	9338	8601	8878	7215	7617	0.936826	0.933053	0.791379	0.815699	0.869239	0.0765266
WDR41	8399	7702	7891	7389	7763	5893	6952	6699	0.924277	0.765126	0.881004	0.906618	0.869256	0.0716572
RAD1	9719	9693	9438	9624	7926	8167	8594	8743	0.815516	0.842567	0.910574	0.908458	0.869279	0.0477643
PARP2	9024	8792	8925	7984	8340	8647	6445	6770	0.924202	0.983508	0.722129	0.847946	0.869446	0.112802
NFATC1	9567	9431	9634	9882	8147	8196	8362	8803	0.851573	0.869049	0.867968	0.890812	0.86985	0.0160999
CENPH	8838	8616	7926	7462	7322	7151	7022	6982	0.828468	0.829968	0.885945	0.935674	0.870014	0.0512992
EGFP	8929	8831	8261	8559	8115	7754	6961	7321	0.908836	0.878043	0.842634	0.855357	0.871218	0.0290422
MTX3	9527	9288	9305	9406	8346	8094	8319	7935	0.876037	0.871447	0.894035	0.84361	0.871282	0.0208652
SLX1B	9538	9691	9451	8967	8268	8507	7979	8052	0.866848	0.877825	0.844249	0.897959	0.87172	0.0223915
NIPA1	9213	9063	9131	8988	7526	8419	7869	7913	0.816889	0.928942	0.86179	0.880396	0.872004	0.0463836
ATP9B	9497	9465	9414	9485	8229	8150	8326	8312	0.866484	0.861067	0.884427	0.876331	0.872077	0.0103783
PAM	9189	9407	8374	8763	7568	8547	7433	7616	0.823593	0.908579	0.887628	0.869109	0.872227	0.0362105
APBA2	8516	7903	8457	7700	6511	7163	7559	7121	0.764561	0.906365	0.893816	0.924805	0.872387	0.0730019
TMED7	9801	9286	9639	9916	7930	8436	8258	9096	0.809101	0.908464	0.856728	0.917305	0.8729	0.0502278
RASA1	9648	9635	9748	9863	8024	8507	8372	9077	0.831675	0.882927	0.858843	0.920308	0.873438	0.0376122
ARCN1	1598	2321	1578	1574	1386	1180	1508	1835	0.867334	0.508402	0.95564	1.16582	0.874299	0.274184
GSR	8972	9048	8585	8263	7568	8286	7543	7109	0.843513	0.915782	0.878626	0.860341	0.874566	0.0309941
PMS2	7790	7855	6726	6489	6393	6738	5931	6098	0.820668	0.857798	0.881802	0.939744	0.875003	0.0499534
USP25	9578	9543	9413	9325	8048	8377	8496	8212	0.840259	0.877816	0.902582	0.880643	0.875325	0.0258653
NRIP1	9463	9575	9630	9855	8574	8863	8014	8258	0.906055	0.92564	0.832191	0.83795	0.875459	0.0473753
ANKRD12	9541	9621	9616	9813	8456	8610	8460	8270	0.88628	0.894917	0.879784	0.84276	0.875935	0.0229694
REV3L	9483	9476	9363	9311	8764	8165	8347	7758	0.92418	0.86165	0.891488	0.833208	0.877632	0.039105
CHRNB1	9522	7572	7552	7556	7060	6881	7180	6887	0.741441	0.908743	0.950742	0.911461	0.878097	0.0931029
MBD4	9015	8611	8935	8855	7493	8541	7316	7731	0.83117	0.991871	0.818802	0.873066	0.878727	0.0789223
DCPS	9566	9356	9143	9169	8283	8123	7741	8573	0.865879	0.868213	0.846659	0.934998	0.878937	0.0386017
PGGT1B	8375	8337	7368	7212	7253	6150	6225	7704	0.86603	0.737675	0.84487	1.06822	0.879199	0.137973
KIF11	1559	1293	1583	1273	1101	1110	1178	1541	0.706222	0.858469	0.744157	1.21053	0.879843	0.229756
ERCC4	9473	8850	8294	9095	7441	8065	8424	7351	0.785496	0.911299	1.01567	0.808246	0.880179	0.10562
MGA	9387	9295	9140	9504	8663	8722	7717	7757	0.922872	0.938354	0.844311	0.816183	0.88043	0.0594105
RPA3	7524	7465	8649	8164	7314	6411	6484	7688	0.972089	0.858808	0.749682	0.941695	0.880569	0.0995278
OBFC2B	6260	4877	6605	5209	4748	4863	4682	5524	0.758466	0.997129	0.708857	1.06047	0.881231	0.173536
C7orf11	9117	9114	9101	9163	8189	7957	8182	7848	0.898212	0.873052	0.899022	0.856488	0.881694	0.0206811
SLX1B	9239	9434	9129	9142	7898	8426	8607	7669	0.854854	0.893152	0.94282	0.838876	0.882425	0.0462575
DLGAP2	9582	9645	9779	9640	8466	8532	8524	8591	0.883532	0.884603	0.871664	0.891183	0.882745	0.00812524
ERICH1	9592	9626	9689	9609	8432	8703	8458	8407	0.879066	0.904114	0.872949	0.874909	0.882759	0.014463
PAPD4	8962	8914	8406	8658	7889	8631	6947	7430	0.880272	0.968252	0.826433	0.858166	0.883281	0.0608045
ANKRD49	8952	8365	7813	8045	7825	6781	7325	7344	0.874106	0.81064	0.93754	0.912865	0.883788	0.0553148
APC	9598	9280	9197	9608	8214	8030	8725	8321	0.855803	0.865302	0.948679	0.866049	0.883958	0.0433984
TMEM218	9144	8961	9059	9242	7596	8341	8132	8119	0.830709	0.930811	0.897671	0.87849	0.88442	0.0418243
GNRH1	9586	9663	9345	8674	7986	8366	7717	8801	0.83309	0.865777	0.825789	1.01464	0.884824	0.088274
FANCI	9243	8921	9498	9218	8221	8323	8141	7954	0.88943	0.932967	0.857128	0.862877	0.8856	0.0345703
INTS9	8397	8364	9075	9307	7574	7200	7859	8507	0.901989	0.860832	0.866006	0.914043	0.885717	0.0262992
TOPBP1	9691	9559	9205	9648	8254	8372	8354	8762	0.851718	0.875824	0.90755	0.908167	0.885815	0.0272915
DCHS2	9445	9840	9600	9560	8294	8903	8444	8429	0.878137	0.904776	0.879583	0.881695	0.886048	0.012571
POLR3G	9610	9494	9536	9254	8725	8563	8155	8138	0.907908	0.901938	0.85518	0.879404	0.886108	0.0239953
PQLC1	8679	9255	8793	8581	7776	8082	7969	7506	0.895956	0.873258	0.906289	0.874723	0.887556	0.0162338
CBL	9535	9417	9374	9563	8355	8418	8226	8661	0.876245	0.893915	0.877534	0.905678	0.888343	0.0140801
KIAA1967	9618	9828	9506	10034	8638	8838	8240	8927	0.898108	0.899267	0.866821	0.889675	0.888468	0.0150511
CCDC125	9495	9641	9532	9420	8269	8499	8630	8451	0.870879	0.881548	0.905371	0.897134	0.888733	0.0154681
EGFP	9318	9480	9120	9121	8323	8267	8231	8105	0.893217	0.872046	0.902522	0.888609	0.889099	0.0127563
RNF122	8949	8379	8758	8667	7431	7355	8172	7950	0.830372	0.87779	0.93309	0.917272	0.889631	0.0458423
SLC25A46	9427	9444	9316	9506	8592	8758	7937	8307	0.911425	0.927361	0.851975	0.873869	0.891158	0.0344268
CCDC28A	9006	8572	8506	7978	8333	7683	7354	7018	0.925272	0.89629	0.864566	0.879669	0.891449	0.0260057
ATXN1	9269	9436	9197	9086	8072	8316	7956	8630	0.87086	0.881306	0.865065	0.949813	0.891761	0.0392806
MDC1	9441	9386	9031	9662	7908	8622	8398	8565	0.837623	0.918602	0.929908	0.886462	0.893149	0.0413398
LMNB1	9727	9675	9870	9729	8944	8600	8814	8524	0.919502	0.888889	0.893009	0.876143	0.894386	0.0182185
RRM2B	7906	7833	8079	7739	6510	7210	6810	7672	0.823425	0.920465	0.842926	0.991343	0.89454	0.0769505
GTPBP6	8455	8231	8767	8390	7341	7267	7756	7908	0.868244	0.882882	0.884681	0.942551	0.894589	0.0328107
RAD23A	9792	9692	9709	9398	8345	9060	9002	8142	0.852226	0.934792	0.927181	0.866355	0.895138	0.0419089
MED17	9420	9700	9213	9158	8440	8755	8164	8213	0.895966	0.902577	0.886139	0.896812	0.895374	0.00682122
PRIM2	7494	7270	7520	7307	6951	6156	5472	7896	0.927542	0.846768	0.72766	1.08061	0.895644	0.14814
SPSB3	8773	8449	8461	7600	7734	8011	6964	7086	0.881568	0.94816	0.823071	0.932368	0.896292	0.0564798
CNOT7	9787	10040	9959	10110	8676	8859	9298	8934	0.886482	0.882371	0.933628	0.88368	0.89654	0.0247847
ZNF12	9761	10072	9966	9668	8768	8944	8702	8963	0.898269	0.888006	0.873169	0.927079	0.896631	0.0227642
SGCZ	9531	9441	9621	9691	8101	8558	8809	8886	0.849963	0.906472	0.915601	0.916933	0.897242	0.0318605
CEP164	8034	8284	8984	7378	6982	6141	7735	8250	0.869057	0.741309	0.860975	1.11819	0.897382	0.158369
RAD51C	9640	9583	9426	9724	8815	8518	8879	8265	0.914419	0.888866	0.941969	0.849959	0.898803	0.0391223
PSD3	9617	9656	9534	9683	8643	8320	9122	8541	0.898721	0.86164	0.956786	0.882061	0.899802	0.040904
SPTBN5	9983	9792	9816	9579	8643	8930	8309	9382	0.865772	0.911969	0.846475	0.979434	0.900913	0.0591219
RGMB	8539	8221	7967	8118	7000	8015	7532	7028	0.819768	0.974942	0.9454	0.86573	0.90146	0.0713688
UBE2A	8698	8567	7324	7850	7519	6590	8094	6836	0.864452	0.769231	1.10513	0.870828	0.902411	0.142912
LOXL2	9554	9533	9813	9625	8393	9137	8928	8327	0.87848	0.95846	0.909814	0.865143	0.902974	0.0414593
NEFL	9547	9260	9347	9589	9004	8827	8264	7982	0.943123	0.95324	0.884134	0.832412	0.903227	0.056191
ARHGAP11A	9218	8874	8892	8782	7937	8423	7969	7962	0.861033	0.949177	0.896199	0.906627	0.903259	0.0362985
PALB2	9753	9333	9242	9562	8549	8712	8269	8689	0.876551	0.933462	0.89472	0.908701	0.903358	0.0240003
PPFIBP2	9643	9188	9247	9334	8875	8662	7743	8527	0.920357	0.942751	0.837353	0.913542	0.903501	0.0458299
COX7	9719	9842	9339	9521	8521	8522	8900	8751	0.876736	0.865881	0.952993	0.919126	0.903684	0.0401043
UBB	2430	1797	1627	1155	1806	1860	1198	1271	0.74321	1.03506	0.736325	1.10043	0.903756	0.191251
CNDP1	9762	9640	9405	9706	8905	8518	8836	8557	0.912211	0.88361	0.9395	0.88162	0.904235	0.0273502
MAPKBP1	9743	9747	9213	9262	8808	8645	8396	8503	0.904034	0.88694	0.911321	0.918052	0.905087	0.0133841
RAD18	9145	8717	8541	8411	7910	8148	7518	7914	0.864954	0.934725	0.880225	0.940911	0.905204	0.0382559
CDCA2	9241	9485	9361	9509	8563	8757	8443	8284	0.926631	0.923247	0.901934	0.871175	0.905747	0.0255095
SMUG1	9748	9608	9572	9575	8664	8813	8780	8655	0.888798	0.917256	0.917259	0.903916	0.906807	0.0135538
SIRT3	9186	9156	9334	8622	8486	8556	7719	8137	0.923797	0.934469	0.826977	0.943749	0.907248	0.0541315
SLCO6A1	9728	9904	9691	9883	8611	8716	8924	9389	0.885177	0.880048	0.920854	0.950015	0.909024	0.032805
STX8	9066	9224	8901	9493	8895	7801	8872	7745	0.981138	0.845729	0.996742	0.815864	0.909868	0.0923347
CXorf66	8215	7174	7061	7160	5764	6587	6931	7480	0.701643	0.918177	0.981589	1.04469	0.911525	0.14915
SLC12A2	9584	9321	9508	8972	8521	8959	8772	7839	0.889086	0.961163	0.922592	0.873718	0.91164	0.0388124
NADSYN1	9174	9287	9377	9268	8012	8602	8514	8707	0.873338	0.926241	0.907966	0.939469	0.911754	0.0286831
NEF3	10069	9728	9583	9828	9116	8717	8600	9355	0.905353	0.896073	0.897423	0.951872	0.91268	0.0264467
CDH3	9638	9691	9555	9885	8778	8852	9023	8722	0.91077	0.913425	0.944322	0.882347	0.912716	0.0253346
FAM90A1	9497	9459	9746	8950	9327	8390	9096	7607	0.9821	0.886986	0.933306	0.849944	0.913084	0.0572708
JMJD3	5992	4423	4397	4591	4198	4858	4481	3836	0.700601	1.09835	1.0191	0.835548	0.913401	0.179559
CCDC102A	8574	8608	8935	8140	8875	7681	7581	7145	1.03511	0.892309	0.848461	0.877764	0.91341	0.0831548
MBP	9467	9629	9465	9401	8458	8766	8835	8635	0.893419	0.910375	0.933439	0.918519	0.913938	0.0166832
ZNF395	9286	9460	9397	9398	8145	8744	8698	8742	0.877127	0.924313	0.925615	0.930198	0.914313	0.024919
CDH1	9511	9775	9989	9860	8655	9128	8689	9306	0.909999	0.933811	0.869857	0.943813	0.91437	0.0328906
TMEM85	9162	9185	9353	8828	7956	8362	8109	8940	0.868369	0.910397	0.866995	1.01269	0.914612	0.068416
MLL	9604	9822	9614	9475	9160	8954	8602	8517	0.953769	0.911627	0.894737	0.898892	0.914756	0.0269831
PRSS2	9084	8950	9103	8317	8323	8233	7891	7965	0.916226	0.919888	0.866857	0.957677	0.915162	0.0372575
NDUFAF1	9632	9884	9785	9661	8470	9159	8586	9442	0.87936	0.926649	0.877466	0.977332	0.915202	0.0472574
TNFRSF10C	9670	9709	9339	9207	9019	8661	8614	8416	0.932678	0.892059	0.922369	0.914087	0.915298	0.0172587
BTNL3	8907	9509	9643	9411	8203	8345	8694	9063	0.920961	0.87759	0.901587	0.963022	0.91579	0.0361414
FBXO8	9374	9316	9310	9429	8433	8926	8496	8423	0.899616	0.958137	0.912567	0.893308	0.915907	0.0292723
XRCC2	9454	9064	8893	9587	7790	8863	8569	8646	0.82399	0.977824	0.963567	0.901846	0.916807	0.0701153
SLC25A37	7889	7864	6913	7133	6699	6955	6706	6876	0.849157	0.88441	0.970056	0.96397	0.916898	0.0596823
POLG	9759	9611	9441	9791	8969	9045	8639	8772	0.919049	0.941109	0.915051	0.895925	0.917784	0.0185378
C13orf1	9734	9804	9558	9802	8645	8949	9173	8946	0.888124	0.912791	0.95972	0.912671	0.918326	0.0299344
PHF11	9256	9261	9380	9635	8412	8555	8687	8838	0.908816	0.923766	0.926119	0.917281	0.918996	0.00774759
WWOX	8072	7862	8201	8306	7952	7237	7044	7581	0.985134	0.920504	0.85892	0.912714	0.919318	0.0517194
CHEK2	9479	9632	9642	9628	8520	8887	8654	9231	0.898829	0.922654	0.897532	0.958766	0.919445	0.0286453
ARMCX2	9332	9264	9302	9128	7817	8651	8849	8731	0.837655	0.93383	0.951301	0.956507	0.919823	0.0556307
TMED7	9836	9594	9729	9758	8893	9170	8812	9001	0.904128	0.955806	0.905746	0.922423	0.922025	0.0239904
ACOT2	8153	7537	7088	7161	6917	6561	6912	7122	0.848399	0.870506	0.975169	0.994554	0.922157	0.0733932
KCNN2	7340	7405	7297	7361	6799	6649	7042	6625	0.926294	0.897907	0.965054	0.900014	0.922317	0.0312814
DDB1	5674	5002	5748	5793	5032	4519	4745	6219	0.886852	0.903439	0.825505	1.07354	0.922333	0.10623
DCTD	9511	9591	9655	9709	8895	8758	9071	8766	0.935233	0.913148	0.939513	0.902874	0.922692	0.0175508
BRIP1	7474	7816	8067	7963	6387	6578	7780	8216	0.854562	0.841607	0.964423	1.03177	0.923091	0.0910232
GTF2B	8884	8891	8847	8531	8169	7892	8064	8313	0.919518	0.887639	0.911495	0.974446	0.923275	0.0367027
ASMTL	9612	9934	9288	9464	9326	8816	8731	8489	0.970246	0.887457	0.94003	0.896978	0.923678	0.0385606
MTMR15	4906	4364	4888	4959	4537	4145	3462	5514	0.924786	0.949817	0.708265	1.11192	0.923696	0.165853
AASDHPPT	9382	9095	9543	9880	8725	8720	8641	8900	0.929972	0.958769	0.90548	0.90081	0.923758	0.0266148
EXOSC8	10138	10027	10088	9632	9391	9179	9236	9072	0.926317	0.915428	0.915543	0.94186	0.924787	0.012475
FANCF	9188	8957	9515	9046	8729	8597	8051	8534	0.950044	0.959808	0.846138	0.9434	0.924847	0.0529041
BDP1	1828	1700	1892	2030	1575	1828	1569	1895	0.861597	1.07529	0.829281	0.933498	0.924918	0.109305
MIER2	8158	9229	8510	8529	8199	8411	7363	7834	1.00503	0.911366	0.865217	0.918513	0.925031	0.0583268
NBN	8938	8749	8892	8903	8251	8058	7868	8661	0.923137	0.92102	0.88484	0.972818	0.925454	0.036138
MSH4	9323	9364	9062	9475	8384	8638	8823	8589	0.899281	0.922469	0.973626	0.906491	0.925467	0.0335364
HMBS	9632	9134	8913	9515	8146	8782	8961	8482	0.845723	0.961463	1.00539	0.891435	0.926001	0.0711779
MLL3	9432	9078	9324	8607	8698	8893	7571	8531	0.92218	0.979621	0.811991	0.99117	0.92624	0.0819245
VPS26B	9749	9509	9746	9537	9007	8973	8518	9190	0.92389	0.943632	0.874	0.963615	0.926284	0.0384447
RPA4	9560	8765	8760	8814	8038	8049	8586	8514	0.840795	0.918311	0.980137	0.965963	0.926302	0.0628398
ZNF431	9619	9459	9503	9515	8544	9026	8805	8913	0.888242	0.954223	0.92655	0.936731	0.926437	0.0279102
XRCC3	9055	9250	9049	8792	8297	8623	8754	7837	0.916289	0.932216	0.9674	0.891379	0.926821	0.0318477
UBE2B	9918	9908	9923	9908	9039	9456	9307	8954	0.911373	0.95438	0.937922	0.903714	0.926847	0.0234897
AK3	9165	9413	9439	9644	8771	8874	8488	8766	0.95701	0.942739	0.899248	0.908959	0.926989	0.0273496
POLH	10201	10012	10209	9797	9143	9334	9195	9596	0.896285	0.932281	0.900676	0.979484	0.927181	0.0383782
SEMA6A	9487	9866	9663	9901	9087	9103	8980	8913	0.957837	0.922664	0.929318	0.900212	0.927508	0.0237463
KIF11	708	815	877	891	726	720	783	810	1.02542	0.883436	0.892816	0.909091	0.927692	0.0660112
ATM	9672	9587	9734	9559	8921	9435	8459	8962	0.922353	0.984145	0.869016	0.937546	0.928265	0.0474487
NUDT12	9359	9725	9751	9597	8954	8567	9171	8985	0.956726	0.880925	0.940519	0.93623	0.9286	0.032986
ODF3	8545	7340	7192	7324	7896	6777	6414	7155	0.924049	0.923297	0.891824	0.976925	0.929024	0.0352888
AL137058.8-201	9561	9650	9476	9602	9229	8595	9025	8775	0.965276	0.890674	0.952406	0.913872	0.930557	0.0344085
TPTE	8669	8549	8429	8128	7778	7840	7647	8145	0.89722	0.917066	0.907225	1.00209	0.930901	0.0481472
GTF2H4	9378	9467	9487	9525	8803	8920	8975	8546	0.938686	0.94222	0.946031	0.897218	0.931039	0.022746
RAD51L3	10438	10464	10102	10329	9601	9356	9783	9789	0.919812	0.894113	0.968422	0.94772	0.932517	0.0324375
SNRPN	8871	8811	8615	8435	8294	8226	7832	8041	0.934957	0.933606	0.909112	0.95329	0.932741	0.0181314
F2R	9665	9529	9831	9717	8895	9301	8996	8943	0.920331	0.976073	0.915065	0.920346	0.932954	0.0288536
ERCC1	9525	9354	9682	9227	9204	9035	8587	8442	0.966299	0.965897	0.886904	0.914924	0.933506	0.0393347
AP3M2	9889	9807	9577	9716	8991	9356	9147	8991	0.909192	0.954012	0.955101	0.925381	0.935922	0.0225144
GTF2H5	9566	9126	9311	9125	8587	9197	8523	8453	0.897658	1.00778	0.915369	0.926356	0.936791	0.0487804
NEIL2	8850	8793	8489	8559	8171	8111	7925	8301	0.923277	0.922438	0.933561	0.969856	0.937283	0.0222966
BRCA1	10028	10040	10410	10184	9547	9274	9398	9909	0.952034	0.923705	0.902786	0.972997	0.937881	0.0309088
MTMR15	7868	6704	7092	5359	6319	6305	5964	6260	0.803127	0.940483	0.840948	1.16813	0.938171	0.163885
KLF13	9300	9349	9420	9123	8804	8715	8881	8516	0.946667	0.932185	0.942781	0.933465	0.938775	0.00706992
DIXDC1	9559	9539	9770	9627	9000	8738	9522	8889	0.941521	0.916029	0.974616	0.923341	0.938877	0.0261259
EI24	10108	10028	10043	9680	9379	9412	9390	9241	0.927879	0.938572	0.93498	0.954649	0.93902	0.0113271
COG3	9999	10348	10410	10115	9491	9632	9394	9888	0.949195	0.930808	0.902402	0.977558	0.939991	0.0315874
KLHL9	9204	9625	9259	9499	8973	8955	8964	8453	0.974902	0.93039	0.968139	0.889883	0.940829	0.0392058
CHD9	8445	9187	8857	8857	8715	8563	7515	8425	1.03197	0.932078	0.848481	0.951225	0.940939	0.0753208
C2CD2L	9195	9335	9316	9257	8748	8895	8375	8916	0.951387	0.952866	0.898991	0.963163	0.941602	0.0288859
UBE3A	7541	7396	6828	6843	6237	6637	6701	7289	0.827079	0.897377	0.9814	1.06518	0.942758	0.103151
REV1	9381	9379	9497	9465	8952	8728	8952	8956	0.954269	0.93059	0.942613	0.946223	0.943424	0.00984602
DEF8	9624	10005	9413	9704	9283	8943	9192	9142	0.964568	0.893853	0.976522	0.942086	0.944257	0.0365094
CDKN2B	9051	9310	9305	9227	8540	8816	8721	8768	0.943542	0.946939	0.937238	0.950255	0.944493	0.0055593
TTC19	9642	9363	9173	9259	8686	8553	9091	9022	0.90085	0.913489	0.991061	0.974403	0.944951	0.0444531
MYOM2	9322	9592	8859	8588	8802	8518	8243	8774	0.944218	0.888032	0.930466	1.02166	0.946093	0.0557641
UBAP1	9499	9298	9477	9495	8519	9276	9037	8898	0.896831	0.997634	0.953572	0.937125	0.94629	0.0417109
XAB2	1816	1717	1321	1351	1314	1293	1533	1557	0.723568	0.753058	1.16048	1.15248	0.947398	0.241752
DCLRE1B	9474	9389	9280	9207	8931	8822	9103	8538	0.942685	0.93961	0.980927	0.927338	0.94764	0.0231604
VDAC3	9388	9735	9629	9670	9051	9308	9123	8926	0.964103	0.956138	0.94745	0.923061	0.947688	0.0177707
CTNS	8001	8045	7834	7583	6805	7786	7520	7693	0.850519	0.967806	0.959918	1.01451	0.948187	0.0694259
MCC	8987	8851	9332	8191	8041	8296	8762	8375	0.894737	0.937295	0.93892	1.02246	0.948354	0.0534738
CYB5B	7739	7774	7436	6423	6543	6934	6731	7404	0.845458	0.891948	0.905191	1.15273	0.948832	0.138326
ENTPD4	9181	9156	9220	9417	8921	9065	8644	8441	0.971681	0.990061	0.937527	0.896358	0.948907	0.0412442
SERF1A	9494	9504	9489	9596	8861	8940	9278	9058	0.933326	0.940657	0.977764	0.943935	0.94892	0.0197337
FAM160B2	9242	9231	9603	9655	8724	9126	9098	8850	0.943952	0.988625	0.947412	0.916624	0.949153	0.0297002
CETN2	8538	8626	8348	8310	7930	8327	7695	8186	0.928789	0.965337	0.921778	0.985078	0.950246	0.0300659
BNIP3L	9642	9523	9371	9078	9155	9134	8672	8787	0.949492	0.959152	0.925408	0.967944	0.950499	0.0183464
AGPAT5	9052	8700	8782	8244	8291	8674	7874	8217	0.91593	0.997011	0.896607	0.996725	0.951568	0.0528994
MLH1	10232	9691	9832	9699	9327	9124	9495	9580	0.911552	0.941492	0.965724	0.987731	0.951625	0.0327156
GEN1	9768	9777	9354	8973	9120	8975	8935	8978	0.933661	0.917971	0.955206	1.00056	0.951849	0.0358808
RABGAP1	9678	9653	9646	9427	9467	8812	9076	9210	0.978198	0.912877	0.940908	0.976981	0.952241	0.0314314
KIAA0174	9116	9187	8896	9146	8525	9027	8334	8742	0.935169	0.982584	0.936826	0.955828	0.952602	0.0220767
ZNF182	4992	6196	5129	4303	4400	6260	4340	4620	0.88141	1.01033	0.846169	1.07367	0.952894	0.10706
AC131280.9-201	9851	9525	9450	9531	8887	9502	8953	9200	0.902142	0.997585	0.947407	0.965271	0.953101	0.0398171
TREX1	9394	9197	9476	9250	9113	8893	8722	8854	0.970087	0.966946	0.920431	0.957189	0.953663	0.0228256
C9orf123	9070	9055	8518	9286	8687	8526	8708	8301	0.957773	0.941579	1.02231	0.893926	0.953896	0.0530502
CBFB	9890	10288	10133	10260	9578	9471	9840	9940	0.968453	0.920587	0.971085	0.968811	0.957234	0.024459
ARHGEF10	9728	9629	9600	9550	9172	9254	9041	9424	0.942845	0.961055	0.941771	0.986806	0.958119	0.0210723
EGFP	9572	9847	9934	9767	9348	9321	9405	9454	0.976598	0.946583	0.946749	0.967953	0.959471	0.0152016
MAP2K3	9201	9338	8276	8857	8296	8405	8494	8957	0.901641	0.900086	1.02634	1.01129	0.95984	0.0683795
AP3B1	9210	9240	9238	9288	9305	8474	8820	8952	1.01031	0.9171	0.954752	0.963824	0.961498	0.0383198
PRKDC	9882	10043	9843	9962	9430	9680	9355	9772	0.95426	0.963855	0.950422	0.980928	0.962366	0.0136029
CHRFAM7A	9677	9928	9723	9856	9646	9519	9309	9245	0.996797	0.958803	0.957421	0.938007	0.962757	0.0245991
NDN	10284	10199	10182	10115	9691	9988	9863	9758	0.942338	0.979312	0.96867	0.964706	0.963756	0.015554
TP53	9531	9788	9657	8572	9357	8804	9050	8890	0.981744	0.899469	0.937144	1.0371	0.963864	0.0592833
RECQL5	10287	10439	10325	10246	9846	9702	10150	10153	0.95713	0.929399	0.983051	0.990923	0.965126	0.0278515
MMS19	9265	9073	9145	9264	8372	9112	8904	9088	0.903616	1.0043	0.973647	0.981002	0.965641	0.043365
MAP1B	10107	10059	10054	9878	9148	9958	9717	9889	0.905115	0.989959	0.966481	1.00111	0.965667	0.0428709
ATP5A1	8990	9260	9258	9427	8816	8891	8724	9238	0.980645	0.960151	0.94232	0.979951	0.965767	0.0182925
DCP2	10109	10104	10111	10083	9924	9348	9720	10045	0.981699	0.925178	0.961329	0.996231	0.96611	0.0308145
CUL4A	9969	9953	9796	10230	9614	9682	9489	9836	0.96439	0.972772	0.968661	0.961486	0.966827	0.00493878
FAM48A	9135	9340	9296	9229	9043	8966	8640	9120	0.989929	0.959957	0.929432	0.988189	0.966877	0.0284934
PLK2	8405	8832	8072	8371	7617	8627	8094	8234	0.906246	0.976789	1.00273	0.983634	0.967349	0.0421875
MUTYH	9032	8690	8934	9262	8340	8859	8799	8731	0.923384	1.01945	0.984889	0.942669	0.967597	0.0430649
MSH6	9974	9952	9861	10029	9590	9498	9525	9963	0.9615	0.954381	0.965926	0.993419	0.968807	0.0170837
REEP5	10142	10336	10019	9755	9633	9936	9589	9839	0.949813	0.9613	0.957082	1.00861	0.969201	0.026698
CHST5	10406	10443	10494	9958	10101	9882	10113	9938	0.97069	0.94628	0.963694	0.997992	0.969664	0.021494
SNTB2	10162	10258	10120	10218	9837	10023	9814	9860	0.968018	0.977091	0.969763	0.964964	0.969959	0.00515182
APEX1	10127	9908	9993	9863	9773	9451	9678	9795	0.965044	0.953876	0.968478	0.993106	0.970126	0.0165396
MYST3	9977	10125	9815	9841	9748	9568	9497	9781	0.977047	0.944988	0.967601	0.993903	0.970885	0.0204064
MPDZ	9447	9052	8932	9037	8937	8690	8628	9227	0.946015	0.960009	0.965965	1.02102	0.973253	0.0329271
EHD4	9021	9090	8775	8713	8275	8572	8506	9276	0.917304	0.943014	0.969345	1.06462	0.97357	0.0643085
F2RL1	10049	10098	9917	10030	9778	9704	9538	10045	0.973032	0.960982	0.961783	1.0015	0.974323	0.0189318
PSMD7	5196	2907	2578	3905	2826	3915	3258	2902	0.54388	1.34675	1.26377	0.74315	0.974387	0.39209
EGFP	9749	9562	9509	9799	9269	9505	9455	9406	0.950764	0.994039	0.994321	0.959894	0.974755	0.0227385
NRN1L	10016	9918	10048	10202	9526	9814	9923	9914	0.951078	0.989514	0.98756	0.97177	0.974981	0.0178053
ERCC5	9134	9360	8946	8960	8968	9270	8897	8449	0.981826	0.990385	0.994523	0.942969	0.977426	0.0235718
RAD51L1	10054	9981	10000	9721	10135	9749	9500	9535	1.00806	0.976756	0.95	0.980866	0.97892	0.0237611
PPP2CB	10017	9672	9146	9773	9494	9461	9339	9484	0.947789	0.978184	1.0211	0.970429	0.979376	0.030661
FANCC	10159	10098	9822	9954	9635	9726	9893	9980	0.94842	0.963161	1.00723	1.00261	0.980355	0.0290576
CLN8	9070	9273	9395	8587	8672	8691	8878	9313	0.956119	0.937237	0.944971	1.08455	0.980718	0.0696513
PARP1	9365	9600	8348	8852	9081	8911	8552	8866	0.969674	0.928229	1.02444	1.00158	0.980981	0.0417269
NSF	8759	8014	8236	7846	8628	7280	8946	7446	0.985044	0.90841	1.08621	0.949019	0.98217	0.0760952
CCNH	9722	9879	9676	9755	9603	9610	9383	9782	0.98776	0.972771	0.969719	1.00277	0.983254	0.0152118
BHMT	9845	9997	10433	10158	9616	9979	10039	10137	0.976739	0.998199	0.962235	0.997933	0.983777	0.0175306
MAPK10	10103	10075	10005	10055	9933	9770	9889	9993	0.983173	0.969727	0.988406	0.993834	0.983785	0.0103333
TREX1	9124	9185	9015	9059	8593	8835	9248	9122	0.941802	0.961894	1.02585	1.00695	0.984124	0.0389327
DHRS7C	10230	10141	10155	10172	10138	10305	9876	9751	0.991007	1.01617	0.972526	0.958612	0.984579	0.0248931
SORBS3	10093	10414	10462	10144	10310	10003	10033	10142	1.0215	0.960534	0.958994	0.999803	0.985208	0.0306925
ESD	10131	10132	10090	10308	9978	10334	10030	9750	0.984898	1.01994	0.994054	0.945867	0.986189	0.0307044
SLCO4C1	9500	9662	9671	9736	9403	9598	9320	9742	0.989789	0.993376	0.963706	1.00062	0.986872	0.0160871
TRAPPC1	10389	10495	10337	10369	10271	10426	10353	10004	0.988642	0.993425	1.00155	0.964799	0.987104	0.0157952
EGFP	9223	9000	9204	9092	9169	9315	8726	8835	0.994145	1.035	0.948066	0.971733	0.987236	0.0369854
UNG	10249	10292	10139	10270	10054	10163	10368	9858	0.980974	0.987466	1.02259	0.959883	0.987727	0.0260519
RGNEF	9816	9623	10109	9963	9774	9646	9960	9658	0.995721	1.00239	0.985261	0.969387	0.98819	0.0143818
MGAM	9691	9704	9550	9611	9472	9544	9385	9711	0.977402	0.983512	0.982723	1.0104	0.98851	0.0148464
ARRDC3	9460	8873	9206	8926	9238	8879	9161	8801	0.976533	1.00068	0.995112	0.985996	0.989579	0.0105956
no esiRNA	8780	8690	8125	7571	7780	8488	8308	8126	0.886105	0.976755	1.02252	1.07331	0.989672	0.0795128
PRR16	10373	10323	10233	10196	10238	10256	10054	10155	0.986985	0.99351	0.982508	0.995979	0.989745	0.00613809
CHMP7	9919	10108	9916	10122	10048	9360	10048	10190	1.01301	0.925999	1.01331	1.00672	0.989759	0.0426147
AFDC1	9811	9612	10016	9832	9359	9914	9847	9741	0.953929	1.03142	0.983127	0.990745	0.989805	0.0319597
DOCK5	9815	9880	10195	10182	9830	9698	10203	9961	1.00153	0.981579	1.00078	0.978295	0.990547	0.012328
TNKS	9263	9158	9246	8952	9298	9031	9159	8792	1.00378	0.986132	0.990591	0.982127	0.990657	0.0094059
MIZF	9943	9913	9900	9775	10056	9562	9723	9840	1.01136	0.964592	0.982121	1.00665	0.991182	0.0218763
C10orf59	10029	9830	10009	10223	9930	9979	9966	9875	0.990129	1.01516	0.995704	0.965959	0.991737	0.0202596
RAD23B	10100	10207	10141	10129	10027	10070	9953	10196	0.992772	0.986578	0.981461	1.00661	0.991857	0.0108714
OCA2	9439	9188	9513	9395	9169	9356	9433	9293	0.971395	1.01828	0.99159	0.989143	0.992603	0.0193418
DDB2	9161	9029	9680	8852	8898	9309	9444	8790	0.971291	1.03101	0.97562	0.992996	0.99273	0.02719
SUCLA2	9818	10064	9671	9842	9614	10020	9753	9737	0.979222	0.995628	1.00848	0.989331	0.993165	0.0122433
BLM	9884	10103	9595	9861	9969	10081	9576	9551	1.0086	0.997822	0.99802	0.968563	0.993251	0.0172116
C13orf23	9617	9591	9456	9670	9248	9485	9705	9652	0.96163	0.988948	1.02633	0.998139	0.993762	0.0266808
ZNF100	10066	9997	9974	9841	10065	9947	9580	10037	0.999901	0.994998	0.960497	1.01992	0.993828	0.0246968
FNBP4	9956	10330	9805	9864	10080	9962	9912	9760	1.01245	0.964376	1.01091	0.989457	0.9943	0.0225426
EPHB2	9881	10115	9880	9896	9915	9833	9754	10045	1.00344	0.972121	0.987247	1.01506	0.994466	0.0187612
RECQL4	9977	9929	10009	9951	9768	9912	9986	9980	0.979052	0.998288	0.997702	1.00291	0.994489	0.0105522
EGFP	10260	9861	10219	9957	10079	10015	10070	9905	0.982359	1.01562	0.985419	0.994778	0.994543	0.0150097
GATA3	9903	9837	10007	9971	9735	9799	10048	9925	0.983035	0.996137	1.0041	0.995387	0.994664	0.00869673
INTS10	9984	9932	9943	9805	9762	10192	9419	10106	0.977764	1.02618	0.9473	1.0307	0.995485	0.0400746
AGRN	9930	10098	9904	9850	9897	10084	9670	9955	0.996677	0.998614	0.976373	1.01066	0.995581	0.014221
EGFP	9158	9297	8705	9465	9101	9066	9075	9192	0.993776	0.975153	1.0425	0.971157	0.995648	0.032756
PPP1R3B	10274	10428	10118	10047	10244	10256	10144	10054	0.99708	0.983506	1.00257	1.0007	0.995963	0.00861166
KCTD9	9864	8968	10043	9888	9693	9201	9890	9798	0.982664	1.02598	0.984766	0.990898	0.996077	0.0202397
SERINC5	9742	9293	9588	9547	9460	9320	9903	9335	0.971053	1.00291	1.03285	0.977794	0.996152	0.0280451
COMMD10	9606	9323	9248	9579	9165	9277	9881	9276	0.954091	0.995066	1.06845	0.968368	0.996493	0.0508867
C4orf41	10269	10371	10189	10336	10386	10428	9999	10230	1.01139	1.0055	0.981352	0.989745	0.996997	0.0138666
SETMAR	9406	9297	9182	9531	9095	9583	9322	9314	0.966936	1.03076	1.01525	0.977232	0.997545	0.0303661
NDEL1	10200	10067	10148	10265	10168	10084	10042	10316	0.996863	1.00169	0.989555	1.00497	0.998269	0.00669562
DTWD2	9887	10141	10142	10020	9998	9900	10091	10152	1.01123	0.976235	0.994971	1.01317	0.998902	0.0171738
OGG1	9690	9785	9705	9901	9759	9812	9793	9693	1.00712	1.00276	1.00907	0.978992	0.999485	0.0139142
DCTN6	9999	9927	10110	9925	9850	9998	10047	10066	0.985099	1.00715	0.993769	1.01421	1.00006	0.0130876
ANGPTL5	9466	9444	9139	9703	9528	9511	9149	9588	1.00655	1.00709	1.00109	0.988148	1.00072	0.00880937
FANCB	9654	9626	9775	9619	10058	9431	9930	9297	1.04185	0.979742	1.01586	0.966525	1.00099	0.0343012
AGA	9725	9587	9834	9514	9415	9789	9982	9541	0.968123	1.02107	1.01505	1.00284	1.00177	0.023679
IPO5	10091	10147	10188	10149	10122	10102	10060	10371	1.00307	0.995565	0.987436	1.02187	1.00199	0.0147155
PRRC1	10399	10554	10205	9749	10505	10186	10047	10221	1.01019	0.965132	0.984517	1.04842	1.00206	0.0359926
MRPS31	9871	9721	10024	9903	9924	9846	9991	9840	1.00537	1.01286	0.996708	0.993638	1.00214	0.0087007
FAM3A	8915	9231	9034	8639	8641	9423	8548	9264	0.969265	1.0208	0.946203	1.07235	1.00215	0.056234
ATP5L	9488	9711	9739	9414	9678	9712	9433	9612	1.02003	1.0001	0.96858	1.02103	1.00244	0.0245417
CDKN2AIP	10037	9617	10114	9737	9951	9598	9958	10102	0.991432	0.998024	0.984576	1.03749	1.00288	0.0237153
PLSCR3	10166	10235	10166	10193	9992	10327	10361	10217	0.982884	1.00899	1.01918	1.00235	1.00335	0.0153001
RBM11	10111	10134	9749	9694	9938	9877	9960	10031	0.98289	0.97464	1.02164	1.03476	1.00348	0.0292363
FER	9574	10088	9428	9753	9685	9741	9623	9914	1.01159	0.965603	1.02068	1.01651	1.0036	0.0256004
KIF11	1058	1330	1206	1147	1101	1087	1292	1246	1.04064	0.817293	1.07131	1.08631	1.00389	0.125841
TNFAIP8	9351	10106	9821	9997	9788	10015	9815	9782	1.04673	0.990995	0.999389	0.978494	1.0039	0.0298163
DMXL1	10167	10339	10150	10115	10354	10351	10061	10170	1.01839	1.00116	0.991232	1.00544	1.00406	0.0112591
VPS39	10035	10170	9701	10250	10070	10122	10006	10116	1.00349	0.99528	1.03144	0.986927	1.00428	0.0193255
IQGAP2	9380	9550	8829	9159	9238	9308	8891	9623	0.984861	0.97466	1.00702	1.05066	1.0043	0.0337299
BET1L	10404	10569	10031	10412	10451	10572	10394	10183	1.00452	1.00028	1.03619	0.978006	1.00475	0.0239692
SNX2	9002	8726	8903	8356	9325	8590	9211	8065	1.03588	0.984414	1.0346	0.965175	1.00502	0.0357739
MAN2A1	10678	10483	10482	10442	10676	10612	10503	10505	0.999813	1.01231	1.002	1.00603	1.00504	0.005487
EBPL	10043	10080	10042	9911	10090	9925	10376	9908	1.00468	0.984623	1.03326	0.999697	1.00557	0.0203372
PPIC	9422	9533	9489	9894	9512	9613	9533	9891	1.00955	1.00839	1.00464	0.999697	1.00557	0.00444168
TBX3	10272	9841	10187	10277	10119	10491	10079	10137	0.985105	1.06605	0.989398	0.986377	1.00673	0.0395859
IL13RA1	9231	9595	9445	9264	9726	9521	9603	8946	1.05362	0.992288	1.01673	0.965674	1.00708	0.0373841
EIF4A1	1174	1238	1314	1339	1117	1240	1459	1293	0.951448	1.00162	1.11035	0.965646	1.00726	0.0718937
MTMR9	9504	9715	10016	9906	9504	9822	9999	10110	1	1.01101	0.998303	1.02059	1.00748	0.0104024
POLM	9559	9692	10189	10221	9753	10146	9894	10141	1.0203	1.04684	0.971047	0.992173	1.00759	0.0330417
CDRT4	9763	9856	10063	9728	10150	9933	9678	9939	1.03964	1.00781	0.961741	1.02169	1.00772	0.0333071
STK11	10085	10071	10058	9997	9854	10015	10340	10337	0.977095	0.994439	1.02804	1.03401	1.0084	0.027181
EBF2	9822	9754	9589	9865	9823	9885	9768	9883	1.0001	1.01343	1.01867	1.00182	1.00851	0.00899576
CNDP2	9835	9917	9897	9738	10103	10137	9728	9759	1.02725	1.02218	0.982924	1.00216	1.00863	0.020274
SLC20A2	9809	9235	9149	8750	9241	9173	9269	9512	0.942094	0.993286	1.01312	1.08709	1.0089	0.0601044
DDEFL1	9839	10025	9999	9996	10016	10109	10304	9785	1.01799	1.00838	1.0305	0.978892	1.00894	0.0219855
GPSM1	9641	9686	9192	9120	9628	9730	9096	9521	0.998652	1.00454	0.989556	1.04397	1.00918	0.0239982
GTF2H1	9539	9554	9861	9784	9935	9796	9927	9435	1.04151	1.02533	1.00669	0.96433	1.00947	0.0332852
FANCD2	9341	9447	9618	9513	9411	9440	9765	9666	1.00749	0.999259	1.01528	1.01608	1.00953	0.00786746
ITPKA	9625	9451	9773	9602	9529	9540	9915	9838	0.990026	1.00942	1.01453	1.02458	1.00964	0.0145123
PLA2G4B	9949	10117	9945	9957	9861	10279	10127	10094	0.991155	1.01601	1.0183	1.01376	1.00981	0.0125721
RNF152	9229	9238	9591	9659	9653	9622	9534	9287	1.04594	1.04157	0.994057	0.961487	1.01076	0.0403887
R3HCC1	9502	9622	9536	9853	9745	9850	9852	9471	1.02557	1.0237	1.03314	0.96123	1.01091	0.0333699
DCLRE1C	9534	9678	9743	9850	9573	9905	9790	9970	1.00409	1.02346	1.00482	1.01218	1.01114	0.00898775
NEK3	9402	9641	9792	9528	9558	9448	9760	10029	1.01659	0.979981	0.996732	1.05258	1.01147	0.0312259
ODF4	9265	9685	9666	9697	9809	9758	9521	9662	1.05872	1.00754	0.984999	0.996391	1.01191	0.0325317
KIAA1012	9221	9186	9003	9157	9042	8900	9237	9822	0.980588	0.968866	1.02599	1.07262	1.01202	0.0473219
NTHL1	9615	9488	9720	9348	9748	9642	9628	9605	1.01383	1.01623	0.990535	1.02749	1.01202	0.0155137
ZNF675	9790	9856	9616	9947	10122	10030	9855	9670	1.03391	1.01765	1.02485	0.972152	1.01214	0.0274779
LSM1	9686	9235	8917	8456	9119	9428	9567	8584	0.941462	1.0209	1.07289	1.01514	1.0126	0.054072
MCCC2	10038	9876	10174	10394	10000	10289	10411	10309	0.996214	1.04182	1.02329	0.991822	1.01329	0.0235684
DYNC1LI2	9320	9183	9243	9352	9400	9296	9426	9475	1.00858	1.01231	1.0198	1.01315	1.01346	0.00466856
ITM2B	8998	9346	9517	9640	9446	9773	9214	9553	1.04979	1.04569	0.968162	0.990975	1.01365	0.0404794
P2RY5	9273	9226	9537	9102	9383	9424	9596	9266	1.01186	1.02146	1.00619	1.01802	1.01438	0.00675401
TUBGCP5	9776	9544	9654	9928	10149	9686	9742	9884	1.03815	1.01488	1.00912	0.995568	1.01443	0.0177677
ALKBH3	9416	9638	9445	9556	9714	9863	9464	9581	1.03165	1.02335	1.00201	1.00262	1.01491	0.0149312
NDNL2	9727	9581	9462	9806	9758	9271	10060	10064	1.00319	0.967644	1.0632	1.02631	1.01509	0.0401384
ERCC6	10035	10059	9869	9951	9902	10131	10354	10145	0.986746	1.00716	1.04914	1.0195	1.01564	0.0261034
ZNF474	9791	9540	9834	9925	9858	9885	9942	10021	1.00684	1.03616	1.01098	1.00967	1.01592	0.0136089
RNF214	9708	9959	9874	9788	9971	10056	9792	10144	1.02709	1.00974	0.991695	1.03637	1.01622	0.019729
CSMD1	9621	9390	9667	9399	9599	9683	9707	9702	0.997713	1.0312	1.00414	1.03224	1.01632	0.0179768
ATR	10242	10187	9887	9846	10232	10286	10457	9841	0.999024	1.00972	1.05765	0.999492	1.01647	0.0278934
APEX2	9933	10008	9597	9886	10011	10141	9872	10051	1.00785	1.01329	1.02865	1.01669	1.01662	0.00880911
MRPS36	9684	9742	9904	9606	9889	9996	9852	9845	1.02117	1.02607	0.99475	1.02488	1.01672	0.0147936
EFNA5	8534	8956	8831	8706	9107	9312	8819	8371	1.06714	1.03975	0.998641	0.961521	1.01676	0.0463561
SCAMP1	9563	9599	9056	9922	9710	9681	9602	9767	1.01537	1.00854	1.06029	0.984378	1.01715	0.0316882
COL4A3BP	9722	9783	9637	9883	10086	9834	10024	9750	1.03744	1.00521	1.04016	0.986543	1.01734	0.0259502
MUS81	9747	9670	9819	9714	9792	10034	9861	9943	1.00462	1.03764	1.00428	1.02357	1.01753	0.0161598
DCLRE1A	9939	9813	9803	9758	10080	10126	9735	10080	1.01419	1.0319	0.993063	1.033	1.01804	0.0187478
C11orf61	9931	9699	9122	9938	9867	9978	9682	9840	0.993556	1.02877	1.06139	0.990139	1.01846	0.0335237
DPYSL2	10173	10463	9972	10098	10366	10469	10452	10166	1.01897	1.00057	1.04813	1.00673	1.0186	0.0211203
LTK	10055	9935	9852	10041	10220	10208	9970	10283	1.01641	1.02748	1.01198	1.0241	1.01999	0.00707115
OIP5	9623	9591	9675	9461	9862	9805	9688	9762	1.02484	1.02231	1.00134	1.03181	1.02008	0.0131195
AC106011.3	10000	10098	9981	10168	10238	10388	10184	10270	1.0238	1.02872	1.02034	1.01003	1.02072	0.00791314
CHRFAM7A	9906	9933	9748	9743	9986	10320	9979	9863	1.00808	1.03896	1.0237	1.01232	1.02076	0.0138092
no esiRNA	9914	10086	9893	9574	10099	10124	10114	9945	1.01866	1.00377	1.02234	1.03875	1.02088	0.0143673
PPAP2C	9673	9780	9865	9531	9846	10112	9826	9884	1.01788	1.03395	0.996047	1.03704	1.02123	0.0187703
USP47	9884	9865	9670	9756	10033	10007	10082	9895	1.01507	1.01439	1.04261	1.01425	1.02158	0.0140215
ADRA1A	9493	9496	9359	9641	9672	9726	9441	9989	1.01886	1.02422	1.00876	1.0361	1.02198	0.0113837
CAMK4	9231	9131	9328	9323	9568	9160	9602	9508	1.03651	1.00318	1.02937	1.01984	1.02223	0.0144179
ARSB	9853	9849	9845	9442	10093	9814	9678	10247	1.02436	0.996446	0.983037	1.08526	1.02227	0.0453793
MARVELD2	9322	9665	9436	9560	9464	9837	9605	9940	1.01523	1.0178	1.01791	1.03975	1.02267	0.0114515
ZFP106	9594	9458	10025	9954	9943	10062	9851	10032	1.03638	1.06386	0.982643	1.00784	1.02268	0.035151
no esiRNA	9727	9644	9788	9664	10075	9960	9633	10037	1.03578	1.03277	0.984164	1.0386	1.02283	0.0258842
AC012652.1	8677	9129	8095	6391	7293	7254	8738	8804	0.840498	0.794611	1.07943	1.37756	1.02303	0.267312
ZNF516	9083	9527	9706	9859	9694	9820	9882	9626	1.06727	1.03075	1.01813	0.976367	1.02313	0.0374972
LONRF1	9531	9373	9739	9894	9932	9738	9894	9851	1.04207	1.03894	1.01592	0.995654	1.02315	0.0217243
SRFBP1	9862	9844	9885	9899	10206	10148	9883	10173	1.03488	1.03088	0.999798	1.02768	1.02331	0.0159494
EGFP	10056	10124	10379	9523	10367	10373	10493	9782	1.03093	1.0246	1.01098	1.0272	1.02343	0.00869218
NOLA3	9952	10048	9799	10019	9934	10237	10271	10319	0.998191	1.01881	1.04817	1.02994	1.02378	0.0209145
EGFP	9241	9331	9147	9478	9342	9521	9504	9715	1.01093	1.02036	1.03903	1.02501	1.02383	0.0117025
SIDT2	9448	9978	10080	9959	10178	10009	10055	10138	1.07727	1.00311	0.99752	1.01797	1.02397	0.0365659
AC069282.6-201	9845	9824	10065	9906	10181	10124	10118	10165	1.03413	1.03054	1.00527	1.02615	1.02402	0.0129217
CYFIP1	9817	9722	9788	9752	10074	10016	9847	10094	1.02618	1.03024	1.00603	1.03507	1.02438	0.0127627
CYB5A	9762	10083	10018	10088	10305	10147	10144	10330	1.05562	1.00635	1.01258	1.02399	1.02463	0.0219131
TFDP1	3903	3473	2775	2962	3027	3242	3625	3210	0.775557	0.933487	1.30631	1.08373	1.02477	0.225963
ADNP2	9840	9849	9987	9825	10266	10083	10070	10071	1.04329	1.02376	1.00831	1.02504	1.0251	0.0143138
TRIM36	9413	9143	9076	9295	9567	9442	9515	9325	1.01636	1.0327	1.04837	1.00323	1.02516	0.0196132
POLI	9459	10099	10048	9729	10039	9974	10093	10191	1.06132	0.987623	1.00448	1.04749	1.02523	0.0348454
CLK2	9571	9528	9776	9778	10121	9843	9875	9792	1.05747	1.03306	1.01013	1.00143	1.02552	0.02513
AOF2	10048	9929	9640	10039	10229	10233	9870	10345	1.01801	1.03062	1.02386	1.03048	1.02574	0.00604163
FEM1C	9636	9554	9380	9608	9857	9829	9762	9710	1.02293	1.02878	1.04072	1.01062	1.02576	0.0125221
RB1	9679	9877	9692	9680	10131	10141	9707	9952	1.0467	1.02673	1.00155	1.0281	1.02577	0.0185391
DMGDH	9107	9402	9747	9867	9842	9679	9605	9953	1.08071	1.02946	0.985431	1.00872	1.02608	0.0406177
FAM50B	9281	9896	9755	10174	9994	10126	9976	9992	1.07682	1.02324	1.02266	0.982111	1.02621	0.0388496
ERCC3	9967	10079	10057	9872	9945	10286	10344	10478	0.997793	1.02054	1.02854	1.06139	1.02706	0.0263284
no esiRNA	8813	9715	9578	9657	9666	9410	9861	9792	1.09679	0.968605	1.02955	1.01398	1.02723	0.0530919
CASC4	10123	9966	10373	9910	10588	10276	10294	10319	1.04593	1.03111	0.992384	1.04127	1.02767	0.0243277
RIC8A	9825	10017	9873	9753	10248	9766	10313	10245	1.04305	0.974943	1.04457	1.05045	1.02825	0.0356824
RAD54L	9826	9921	9920	9627	10074	10217	10085	10047	1.02524	1.02984	1.01663	1.04363	1.02883	0.0112788
ATRX	9741	9829	9407	9483	9833	9760	10015	9957	1.00944	0.99298	1.06463	1.04998	1.02926	0.0336135
TBCA	9948	10179	10192	9843	10374	10240	10421	10343	1.04282	1.00599	1.02247	1.0508	1.03052	0.0202398
PMS1	9920	9728	9532	9845	9961	10256	9940	10051	1.00413	1.05428	1.0428	1.02092	1.03053	0.0223874
ZNF608	10029	9995	10044	9583	10262	10337	10120	10145	1.02323	1.03422	1.00757	1.05865	1.03092	0.021479
ADAMTSL3	9523	8655	9606	8767	9410	9086	9598	9527	0.988134	1.0498	0.999167	1.08669	1.03095	0.0458454
GIN1	9517	9241	9598	9490	9813	9577	9765	9862	1.0311	1.03636	1.0174	1.0392	1.03102	0.00967707
FAM65A	9314	9547	9641	9588	9839	9870	9696	9865	1.05637	1.03383	1.0057	1.02889	1.0312	0.0207817
PIK3R1	9430	9381	10002	9852	9935	9811	10064	10049	1.05355	1.04584	1.0062	1.02	1.0314	0.0220932
CTSB	10182	10137	10008	9841	10330	10479	10292	10327	1.01454	1.03374	1.02838	1.04939	1.03151	0.0144041
LRP1B	9671	10030	9837	9831	10288	10084	10067	10199	1.0638	1.00538	1.02338	1.03743	1.0325	0.0246468
RPAP1	9711	9525	9903	9717	9855	10013	10149	10101	1.01483	1.05123	1.02484	1.03952	1.03261	0.0160323
UPF3A	9596	9317	9786	9873	10029	9887	9990	9909	1.04512	1.06118	1.02085	1.00365	1.0327	0.025495
EGFP	9670	9826	9910	10275	10330	10372	10190	10070	1.06825	1.05557	1.02825	0.980049	1.03303	0.0390656
ATG12	9699	9944	9888	9721	10200	10118	10186	10043	1.05165	1.0175	1.03014	1.03312	1.0331	0.0141006
RAD9A	9181	9265	9850	9257	9772	9557	9905	9553	1.06437	1.03152	1.00558	1.03198	1.03336	0.0240734
CCDC112	9621	9237	9679	9234	9923	9688	9759	9652	1.03139	1.04883	1.00827	1.04527	1.03344	0.0183899
SH3GL2	9771	9915	9823	9883	10227	9823	10409	10259	1.04667	0.990721	1.05966	1.03805	1.03377	0.0300441
THEX1	9483	9399	9269	9935	9882	9861	9622	10000	1.04208	1.04915	1.03808	1.00654	1.03396	0.0188454
NUDT1	9343	9389	9391	9453	9818	9423	9775	9854	1.05084	1.00362	1.04089	1.04242	1.03444	0.0210084
MED4	9120	9433	9281	9355	9756	9545	9704	9472	1.06974	1.01187	1.04558	1.01251	1.03492	0.0280434
SLC39A14	9695	9572	9887	9712	9793	10069	10259	10106	1.01011	1.05192	1.03763	1.04057	1.03506	0.0177374
HMGCR	9737	9800	9624	9594	10036	10077	9921	10083	1.03071	1.02827	1.03086	1.05097	1.0352	0.0105795
RECQL	9417	9454	9441	9675	9868	10046	9555	9864	1.04789	1.06262	1.01207	1.01953	1.03553	0.023753
NEIL3	9744	9885	9853	9997	10403	10356	9955	10165	1.06763	1.04765	1.01035	1.01681	1.03561	0.0268444
DMC1	9449	10119	9442	10015	10306	10158	10076	9830	1.0907	1.00385	1.06715	0.981528	1.03581	0.0515182
POLK	10290	9670	10063	10025	10465	10428	10360	10222	1.01701	1.07839	1.02951	1.01965	1.03614	0.0286744
no esiRNA	9585	9626	9646	10047	10108	9977	9983	10239	1.05456	1.03646	1.03494	1.01911	1.03627	0.0145024
CSNK1G3	9308	9253	9281	8905	9206	9616	9824	9435	0.989042	1.03923	1.05851	1.05952	1.03657	0.0330344
MAP2K4	9476	9413	9334	9550	9706	9868	9613	9988	1.02427	1.04834	1.02989	1.04586	1.03709	0.0118268
PLA2G4B	9506	9761	9768	9674	10124	9859	10052	10118	1.06501	1.01004	1.02907	1.0459	1.03751	0.0234693
AP3S1	9454	9166	9467	9409	9754	9805	9504	9838	1.03173	1.06971	1.00391	1.04559	1.03774	0.0274755
WNK1	9635	9222	9663	9288	9801	9694	9827	9901	1.01723	1.05118	1.01697	1.066	1.03785	0.0247065
HISPPD1	9566	9384	9747	9284	10013	9866	9966	9633	1.04673	1.05136	1.02247	1.03759	1.03954	0.0127372
PCM1	9449	9737	9802	9966	9775	10296	10332	10126	1.0345	1.05741	1.05407	1.01605	1.04051	0.0191805
PNKP	9534	9443	9416	9419	10083	9664	10058	9572	1.05758	1.0234	1.06818	1.01624	1.04135	0.0254025
SRP19	9847	9696	9598	9709	10025	10165	10098	10167	1.01808	1.04837	1.05209	1.04717	1.04143	0.0157083
TAF9	9734	9659	9782	9956	10261	10221	10075	10201	1.05414	1.05818	1.02995	1.02461	1.04172	0.0168977
EFHA2	9876	9659	9814	9486	10179	10200	9893	10228	1.03068	1.05601	1.00805	1.07822	1.04324	0.0304566
RAD54B	10085	10015	9835	9441	10310	10245	10255	10247	1.02231	1.02297	1.0427	1.08537	1.04334	0.0295775
ATP6V1F	9783	9908	9799	8948	9709	10128	10053	10161	0.992436	1.0222	1.02592	1.13556	1.04403	0.0628336
FAM82A2	9661	10091	9806	10167	10368	10333	10408	10354	1.07318	1.02398	1.06139	1.01839	1.04424	0.0271428
MSH2	9262	9498	9708	9089	9760	9791	9906	9744	1.05377	1.03085	1.0204	1.07207	1.04427	0.023187
TBC1D20	9398	9308	9892	9411	9831	10035	10046	9769	1.04607	1.0781	1.01557	1.03804	1.04445	0.0258878
TP53BP1	9307	9236	9408	9337	9807	9548	10043	9574	1.05372	1.03378	1.0675	1.02538	1.0451	0.0190859
?	9500	9404	9349	9867	9858	9892	10129	10006	1.03768	1.05189	1.08343	1.01409	1.04677	0.0289885
LEPROTL1	9531	9973	9790	9467	10008	10423	10031	10120	1.05005	1.04512	1.02462	1.06898	1.04719	0.0182267
TGDS	10023	9988	9424	9759	10168	10007	10409	10427	1.01447	1.0019	1.10452	1.06845	1.04733	0.0478207
RAD17	9452	8914	9477	9472	9915	9513	9902	9770	1.04898	1.0672	1.04485	1.03146	1.04812	0.0147529
STARD4	9885	9961	9809	8880	10286	10228	9828	9985	1.04057	1.0268	1.00194	1.12444	1.04844	0.0531292
FUK	9644	9871	9577	9528	10095	10238	10117	10048	1.04676	1.03718	1.05639	1.05458	1.04873	0.00875689
TJP1	9302	9259	9068	9483	9380	9836	9748	9962	1.00839	1.06232	1.07499	1.05051	1.04905	0.0288942
ANGPT2	9670	9479	9424	10026	10227	10056	10004	10209	1.0576	1.06087	1.06154	1.01825	1.04957	0.0209475
FBXO15	9580	9405	9422	9462	9880	10011	9795	10073	1.03132	1.06443	1.03959	1.06457	1.04998	0.0171101
POLL	9503	10153	9882	10089	10610	10442	10320	10283	1.11649	1.02846	1.04432	1.01923	1.05213	0.0441423
KIF13B	9661	9611	9354	9564	10002	10070	10138	9988	1.0353	1.04776	1.08381	1.04433	1.0528	0.0213337
MAP3K1	9810	10042	9763	10069	10603	10542	10232	10402	1.08084	1.04979	1.04804	1.03307	1.05293	0.0200571
CCNDBP1	9688	9608	9689	9598	10350	9939	10026	10315	1.06833	1.03445	1.03478	1.0747	1.05307	0.0214637
ARHGEF6	9328	9328	9221	9704	9794	10042	9870	9876	1.04996	1.07654	1.07038	1.01772	1.05365	0.0265102
MAP3K13	9545	9574	9751	9576	10029	10143	10114	10236	1.05071	1.05943	1.03723	1.06892	1.05407	0.0134702
UGCGL2	9236	9588	9280	9520	9817	9951	10017	9880	1.06291	1.03786	1.07942	1.03782	1.0545	0.0203867
KIF11	836	952	970	823	880	1006	925	952	1.05263	1.05672	0.953608	1.15674	1.05493	0.082947
HERC2	9568	9486	9351	9344	10018	9864	10042	9955	1.04703	1.03985	1.0739	1.06539	1.05654	0.0157962
FSTL5	3528	4359	4994	3646	4394	4685	4092	3962	1.24546	1.07479	0.819383	1.08667	1.05658	0.176235
GTF2F2	9696	9326	9464	9799	10180	9982	10214	10108	1.04992	1.07034	1.07925	1.03153	1.05776	0.0213644
PER1	9491	9183	9543	9282	9829	10020	9730	10071	1.03561	1.09115	1.0196	1.085	1.05784	0.0356084
EGFP	9690	9501	8921	9830	10031	10137	9733	10214	1.03519	1.06694	1.09102	1.03906	1.05805	0.0261352
ASAH1	9025	9283	9195	9115	9552	9815	9665	9729	1.05839	1.05731	1.05111	1.06736	1.05854	0.00669552
ELAVL2	9395	9756	9560	9265	9845	10214	10182	10001	1.0479	1.04695	1.06506	1.07944	1.05984	0.0154949
UBE2V2	9091	9217	8944	9412	9400	9751	9804	9908	1.03399	1.05794	1.09615	1.0527	1.06019	0.0260835
FUT10	9264	9319	9076	9286	9772	9719	9817	9896	1.05484	1.04292	1.08164	1.06569	1.06127	0.0164585
EPB41L4A	9319	9025	9274	9319	9877	9969	9583	9765	1.05988	1.1046	1.03332	1.04786	1.06141	0.0307696
LIG4	9323	9323	9489	9378	9887	10032	10002	10009	1.0605	1.07605	1.05406	1.06729	1.06447	0.00941801
ZADH2	9136	9389	9181	9083	9530	9900	9742	10023	1.04313	1.05443	1.0611	1.10349	1.06554	0.0263679
ELF1	8881	9022	9391	9571	10083	9714	9688	9833	1.13535	1.0767	1.03163	1.02737	1.06776	0.0502804
CDK7	9778	9687	9090	10037	10069	10510	10173	10436	1.02976	1.08496	1.11914	1.03975	1.0684	0.0414833
ZNF236	9487	9443	9184	9319	10032	9908	10151	9917	1.05745	1.04924	1.10529	1.06417	1.06904	0.0249281
GCNT4	9418	9638	9445	9800	10414	10143	10212	10186	1.10575	1.0524	1.08121	1.03939	1.06969	0.0297243
PMS2L3	9658	9591	8840	9583	10174	9882	10029	10196	1.05343	1.03034	1.1345	1.06397	1.07056	0.044882
FANCL	9265	8771	8924	8311	9744	9674	8984	9345	1.0517	1.10295	1.00672	1.12441	1.07145	0.052843
ERCC8	8124	7972	7463	7965	8300	8524	8624	8719	1.02166	1.06924	1.15557	1.09466	1.08528	0.055775
EGFP	9414	8868	8568	9313	9635	9693	9898	10009	1.02348	1.09303	1.15523	1.07473	1.08662	0.0543959
UBR7	9127	8772	9007	9215	9795	9797	9854	10102	1.07319	1.11685	1.09404	1.09626	1.09508	0.0178471
AQR	1119	1165	1167	1133	1228	1218	1283	1369	1.09741	1.04549	1.0994	1.2083	1.11265	0.0684741
VPS11	3192	2332	2273	1328	2488	2541	2944	2049	0.779449	1.08962	1.2952	1.54292	1.1768	0.323292
ARID1B	6786	6131	6646	6289	7412	7287	7450	8303	1.09225	1.18855	1.12098	1.32024	1.1805	0.101528
PPP2R2A	4585	5899	2909	2718	4758	2734	4212	4865	1.03773	0.463468	1.44792	1.78992	1.18476	0.570774
KIF11	1014	765	717	782	1163	864	980	1110	1.14694	1.12941	1.36681	1.41944	1.26565	0.148924
ARID1A	6428	7125	6450	5962	8289	8264	8291	8486	1.28951	1.15986	1.28543	1.42335	1.28954	0.107608
KIF11	4370	2354	1717	1643	2528	5745	3208	3445	0.57849	2.44053	1.86838	2.09677	1.74604	0.813115
